# Supplementary material for: HFIP-mediated C-3-alkylation of indoles and synthesis of indolo[2,3-b]quinolines & related natural products
Source: Royal Society of Chemistry journal article supplement (doi:10.1039/d4ob00414k), 2024-01-01
Supplement: d4ob00414k2.pdf [file d4ob00414k2.pdf]

## Supporting Information-II

### HFIP-mediated C-3-Alkylation of Indoles and Synthesis of Indolo[2-3-*b*]quinolines & Related Natural Products

**Auqib Rashid,<sup>a,b,c</sup> Waseem I. Lone,<sup>a,c</sup> Preeti Dogra,<sup>a</sup> Showkat Rashid,<sup>\*a,c</sup> Bilal A. Bhat<sup>\*b,c</sup>**

<sup>a</sup> Natural Products & Medicinal Chemistry Division, CSIR-Indian Institute of Integrative Medicine (IIIM), Jammu, Jammu and Kashmir 180001, India;

<sup>b</sup> Natural Products & Medicinal Chemistry Division, CSIR-Indian Institute of Integrative Medicine, Sanat Nagar, Srinagar 190005, India;

<sup>c</sup> Academy of Scientific and Innovative Research (AcSIR), Ghaziabad-201002, India

Email: [showkat.rashid@iiim.res.in](mailto:showkat.rashid@iiim.res.in); [bilal@iiim.res.in](mailto:bilal@iiim.res.in).

#### Table of Contents

| <u>S. No.</u> | <u>Contents</u>                              | <u>Page No.</u> |
|---------------|----------------------------------------------|-----------------|
| <u>1</u>      | <u>Preparation of Starting Materials</u>     | <u>S2</u>       |
| <u>2</u>      | <u>Characterisation Data</u>                 | <u>S3-S6</u>    |
| <u>3</u>      | <u>NMR Spectra</u>                           | <u>S7-S27</u>   |
| <u>4</u>      | <u>Reaction Standardization through HPLC</u> | <u>S29-S41</u>  |
| <u>5</u>      | <u>HRMS data</u>                             | <u>S42-S44</u>  |

**1) Preparation of starting Material:** All required alcohols were synthesized using modified version of known protocol.<sup>1</sup>

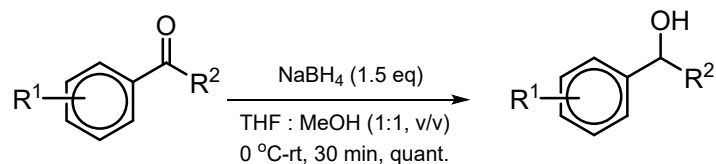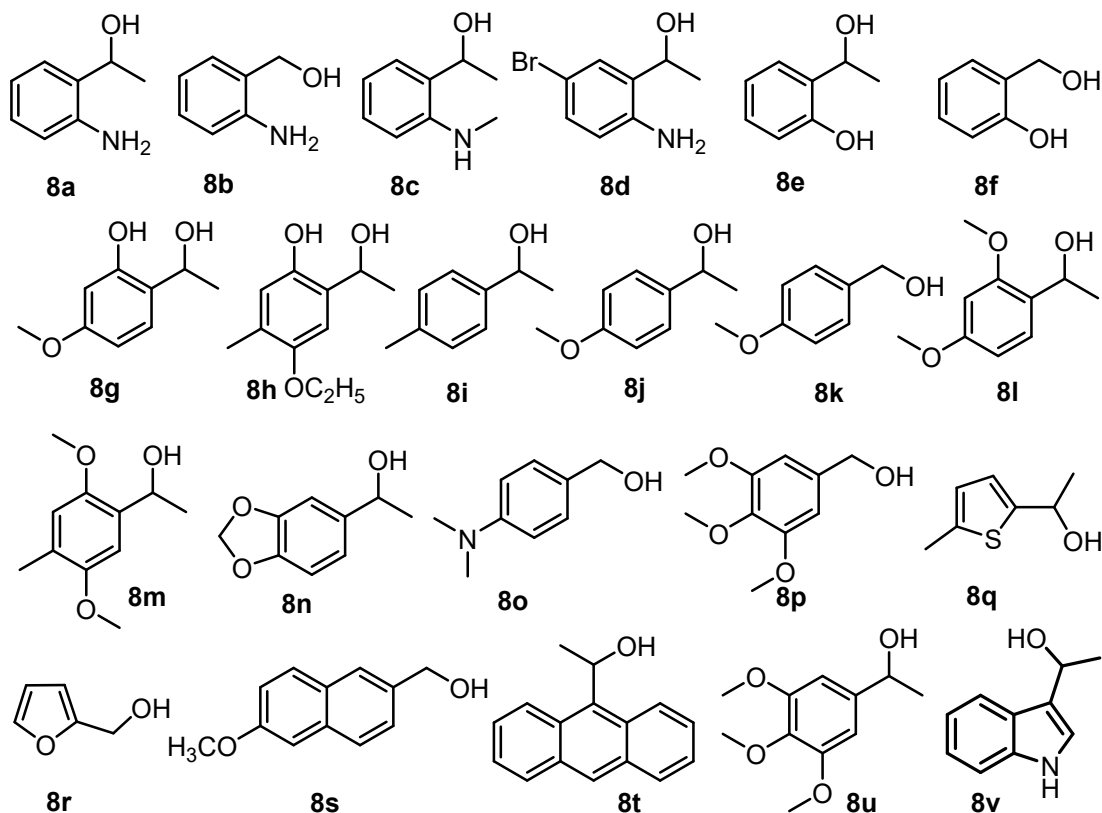

To a solution of respective carbonyl compound (1 equiv.) in THF: MeOH (1:1, v/v),  $\text{NaBH}_4$  (1.5 equiv.) was added slowly at  $0\text{ }^\circ\text{C}$ . After the addition, the cold bath was removed and the reaction mixture was allowed to come to room temperature. After the complete consumption of starting material, as confirmed with TLC, the reaction mixture was quenched with brine and extraction was done with Ethyl acetate (3 times). The combined organic layer was dried over anhydrous  $\text{Na}_2\text{SO}_4$ , concentrated under reduced pressure and the resulting residue was washed through a short silica gel pad (except **compound 8v** which was used as such for further reaction; reason being decomposition on column purification) to afford the desired product (**8a-8u**)

**2) Characterization data for starting material:**

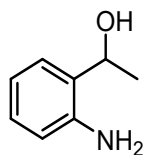

**1-(2-aminophenyl)ethan-1-ol (8a):**

$^1\text{H NMR}$  (400 MHz,  $\text{CDCl}_3$ )  $\delta$  7.10 (m, 2H), 6.73 (t,  $J = 7.4$  Hz, 1H), 6.67 (d,  $J = 7.8$  Hz, 1H), 4.92 (q,  $J = 6.6$  Hz, 1H), 1.59 (d,  $J = 6.6$  Hz, 3H);  $^{13}\text{C NMR}$  (100 MHz,  $\text{CDCl}_3$ )  $\delta$  145.3, 128.7, 128.4, 126.7, 118.2, 116.8, 69.8, 21.6

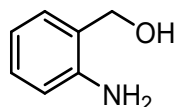

**(2-aminophenyl)methanol (8b):**

$^1\text{H NMR}$  (400 MHz,  $\text{CDCl}_3$ )  $\delta$  7.18 – 7.10 (m, 1H), 7.08-7.04 (m, 1H), 6.76-6.67 (m, 2H), 4.63 (d,  $J = 12.8$  Hz, 2H);  $^{13}\text{C NMR}$  (101 MHz,  $\text{CDCl}_3$ )  $\delta$  145.7, 129.4, 129.3, 125.2, 118.5, 116.3, 64.2

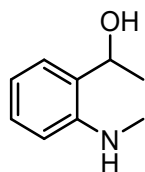

**1-(2-(methylamino)phenyl)ethan-1-ol (8c)**

$^1\text{H NMR}$  (400 MHz,  $\text{CDCl}_3$ )  $\delta$  7.11 (m, 1H), 6.96 (d,  $J = 7.4$  Hz, 1H), 6.57 (dd,  $J = 14.1, 7.6$  Hz, 2H), 4.74 (q,  $J = 6.6$  Hz, 1H), 2.73 (s, 3H), 1.46 (d,  $J = 6.6$  Hz, 3H);  $^{13}\text{C NMR}$  (100 MHz,  $\text{CDCl}_3$ )  $\delta$  147.9, 128.9, 127.8, 126.2, 116.4, 110.6, 69.8, 30.5, 21.4

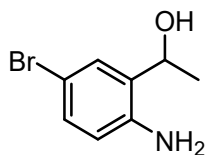

**1-(2-amino-5-bromophenyl)ethan-1-ol (8d):**

$^1\text{H NMR}$  (400 MHz,  $\text{CDCl}_3$ )  $\delta$  7.20 – 7.12 (m, 2H), 6.53 (d,  $J = 8.0$  Hz, 1H), 4.83 (q,  $J = 6.5$  Hz, 1H), 4.25 (s, 2H), 2.13 (s, 1H), 1.55 (d,  $J = 6.6$  Hz, 3H);  $^{13}\text{C NMR}$  (100 MHz,  $\text{CDCl}_3$ )  $\delta$  144.2, 131.2, 130.4, 129.4, 118.3, 109.9, 69.1, 21.5

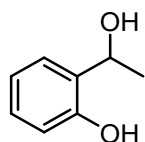

**2-(1-hydroxyethyl)phenol (8e):**

$^1\text{H NMR}$  (400 MHz,  $\text{CDCl}_3$ )  $\delta$  8.15 (d,  $J = 22.6$  Hz, 1H), 7.16 (t,  $J = 7.1$  Hz, 1H), 6.98 (d,  $J = 6.2$  Hz, 1H), 6.85 (d,  $J = 7.3$  Hz, 2H), 5.03 (q,  $J = 6.4$  Hz, 1H), 1.56 (d,  $J = 6.6$  Hz, 1H);  $^{13}\text{C NMR}$  (101 MHz,  $\text{CDCl}_3$ )  $\delta$  155.2, 128.9, 128.7, 126.6, 120.1, 117.0, 71.3, 23.4

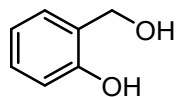

**2-(hydroxymethyl)phenol (8f):**

$^1\text{H NMR}$  (400 MHz,  $\text{CDCl}_3$ )  $\delta$  7.23 – 7.12 (m, 2H), 6.99 (d,  $J = 7.4$  Hz, 1H), 6.86-6.76 (m, 2H), 4.80 (s, 2H);  $^{13}\text{C NMR}$  (101 MHz,  $\text{CDCl}_3$ )  $\delta$  156.1, 129.7, 128.0, 124.8, 120.3, 116.6, 64.7

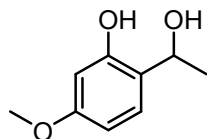

**2-(1-hydroxyethyl)-5-methoxyphenol (8g):**

$^1\text{H NMR}$  (400 MHz,  $\text{CDCl}_3$ )  $\delta$  6.87 (d,  $J = 8.4$  Hz, 1H), 6.44 (d,  $J = 2.1$  Hz, 1H), 6.38 (dd,  $J = 8.3, 2.1$  Hz, 1H), 5.01 (q,  $J = 6.5$  Hz, 1H), 3.75 (s, 3H), 1.55 (d,  $J = 6.7$  Hz, 3H);  $^{13}\text{C NMR}$  (101 MHz,  $\text{CDCl}_3$ )  $\delta$  160.4, 156.8, 127.2, 121.1, 105.8, 102.6, 71.2, 55.4, 23.6

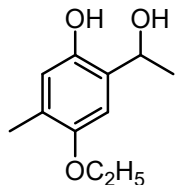

**4-ethoxy-2-(1-hydroxyethyl)-5-methylphenol (8h):**

$^1\text{H NMR}$  (400 MHz,  $\text{CDCl}_3$ )  $\delta$  7.48 (s, 1H), 6.65 (s, 1H), 6.42 (s, 1H), 3.92 (q,  $J = 7.0$  Hz, 2H), 2.16 (s, 3H), 1.54 (d,  $J = 6.6$  Hz, 3H), 1.37 (t,  $J = 7.0$  Hz, 3H);  $^{13}\text{C NMR}$  (100 MHz,  $\text{CDCl}_3$ )  $\delta$  150.5, 148.7, 127.9, 126.1, 119.4, 110.7, 71.5, 64.9, 23.6, 16.0, 15.2

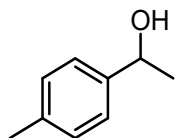

**1-(p-tolyl)ethan-1-ol (8i):**

$^1\text{H NMR}$  (400 MHz,  $\text{CDCl}_3$ )  $\delta$  7.29 (d,  $J = 7.8$  Hz, 2H), 7.20 (d,  $J = 7.8$  Hz, 2H), 4.87 (q,  $J = 6.4$  Hz, 1H), 2.39 (s, 3H), 1.50 (d,  $J = 6.5$  Hz, 3H);  $^{13}\text{C NMR}$  (100 MHz,  $\text{CDCl}_3$ )  $\delta$  143.0, 137.1, 129.2, 129.2, 125.4, 125.4, 70.2, 25.1, 21.1

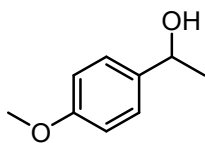

**1-(4-methoxyphenyl)ethan-1-ol (8j):**

$^1\text{H NMR}$  (400 MHz,  $\text{CDCl}_3$ )  $\delta$  7.30 (d,  $J = 8.7$  Hz, 2H), 6.89 (d,  $J = 8.7$  Hz, 2H), 4.84 (m, 1H), 3.81 (s, 2H), 1.47 (d,  $J = 6.4$  Hz, 3H);  $^{13}\text{C NMR}$  (100 MHz,  $\text{CDCl}_3$ )  $\delta$  158.9, 138.1, 126.7, 126.7, 113.8, 113.8, 69.86, 55.31, 25.07

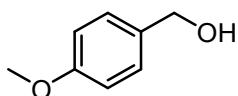

**(4-methoxyphenyl)methanol (8k):**

$^1\text{H NMR}$  (400 MHz,  $\text{CDCl}_3$ )  $\delta$  7.29 (d,  $J = 7.3$  Hz, 2H), 6.90 (d,  $J = 8.6$  Hz, 2H), 4.60 (s, 2H), 3.82 (s, 3H);  $^{13}\text{C NMR}$  (100 MHz,  $\text{CDCl}_3$ )  $\delta$  159.2, 133.2, 128.7, 128.7, 114.0, 114.0, 64.9, 55.4

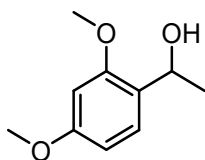

**1-(2,4-dimethoxyphenyl)ethan-1-ol(8l):**

$^1\text{H NMR}$  (400 MHz,  $\text{CDCl}_3$ )  $\delta$  7.27–7.22 (m, 1H), 6.50–6.44 (m, 1H), 5.04 (s, 1H), 3.84 (s, 3H), 3.80 (s, 3H), 2.58 (s, 1H), 1.49 (d,  $J = 6.5$  Hz, 3H);  $^{13}\text{C NMR}$  (100 MHz,  $\text{CDCl}_3$ )  $\delta$  160.2, 157.8, 126.8, 126.1, 104.1, 98.8, 66.2, 55.5, 55.4, 22.9

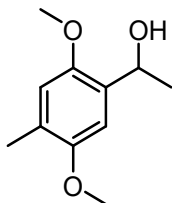

**1-(2,5-dimethoxy-4-methylphenyl)ethan-1-ol(8m):**

$^1\text{H NMR}$  (400 MHz,  $\text{CDCl}_3$ )  $\delta$  6.86 (s, 1H), 6.70 (s, 1H), 5.07 (q,  $J = 6.4$  Hz, 1H), 3.81 (s, 3H), 3.80 (s, 3H), 2.22 (s, 3H), 1.49 (d,  $J = 6.5$  Hz, 3H);  $^{13}\text{C NMR}$  (100 MHz,  $\text{CDCl}_3$ )  $\delta$  151.9, 150.1, 131.5, 126.1, 114.0, 109.0, 66.7, 56.2, 56.0, 23.4, 16.3

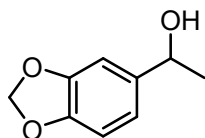

**1-(benzo[d][1,3]dioxol-5-yl)ethan-1-ol(8n):**

$^1\text{H}$  NMR (400 MHz,  $\text{CDCl}_3$ )  $\delta$  6.82 (s, 1H), 6.78-6.68 (m, 2H), 5.88 (s, 2H), 4.72 (q,  $J = 5.2$  Hz, 1H), 3.35 (s, 1H), 1.38 (d,  $J = 6.4$  Hz, 3H);  $^{13}\text{C}$  NMR (100 MHz,  $\text{CDCl}_3$ )  $\delta$  147.6, 146.6, 140.1, 118.6, 108.0, 106.1, 100.9, 69.9, 25.1

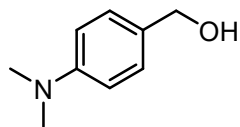

**(4-(dimethylamino)phenyl)methanol(8o):**

$^1\text{H}$  NMR (400 MHz,  $\text{CDCl}_3$ )  $\delta$  7.27 (d,  $J = 8.6$  Hz, 2H), 6.76 (d,  $J = 8.7$  Hz, 2H), 4.58 (s, 2H), 2.98 (s, 6H);  $^{13}\text{C}$  NMR (100 MHz,  $\text{CDCl}_3$ )  $\delta$  150.4, 129.1, 128.7, 128.7, 112.8, 112.8, 65.4, 40.8, 40.8

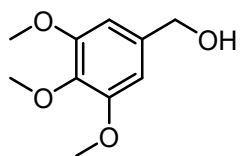

**(3,4,5-trimethoxyphenyl)methanol(8p):**

$^1\text{H}$  NMR (400 MHz,  $\text{CDCl}_3$ )  $\delta$  6.50 (s, 2H), 4.52 (s, 2H), 3.75 (d, 9H);  $^{13}\text{C}$  NMR (100 MHz,  $\text{CDCl}_3$ )  $\delta$  153.3, 153.0, 136.9, 136.7, 103.5, 103.5, 64.9, 60.7, 55.8, 55.8.

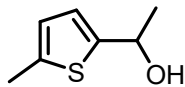

**1-(5-methylthiophen-2-yl)ethan-1-ol(8q):**

$^1\text{H}$  NMR (400 MHz,  $\text{CDCl}_3$ )  $\delta$  6.75 (d,  $J = 3.3$  Hz, 1H), 6.60-6.57 (m, 1H), 5.02 (q,  $J = 6.3$  Hz, 1H), 2.46 (s, 3H), 1.56 (d,  $J = 6.4$  Hz, 3H);  $^{13}\text{C}$  NMR (100 MHz,  $\text{CDCl}_3$ )  $\delta$  147.5, 139.2, 124.7, 123.2, 66.4, 25.1, 15.5

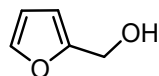

**furan-2-ylmethanol(8r)**

$^1\text{H}$  NMR (400 MHz,  $\text{CDCl}_3$ )  $\delta$  7.37 – 7.35 (m, 1H), 6.31 – 6.24 (m, 2H), 4.53 (s, 2H), 2.95 (s, 1H);  $^{13}\text{C}$  NMR (100 MHz,  $\text{CDCl}_3$ )  $\delta$  154.1, 142.5, 110.4, 107.8, 57.2

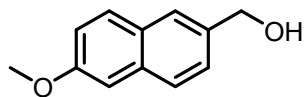

**(6-methoxynaphthalen-2-yl)methanol(8s):**

$^1\text{H}$  NMR (400 MHz,  $\text{CDCl}_3$ )  $\delta$  7.73 (t,  $J = 7.0$  Hz, 3H), 7.45 (dd,  $J = 8.5, 1.4$  Hz, 1H), 7.17 – 7.14 (m, 2H), 4.82 (s, 2H), 3.93 (s, 3H);  $^{13}\text{C}$  NMR (100 MHz,  $\text{CDCl}_3$ )  $\delta$  135.8, 131.8, 129.5, 129.5, 128.9, 128.1, 125.7, 125.7, 124.9, 124.9, 67.4, 23.6

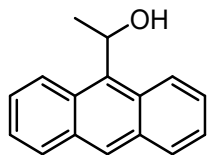

**1-(anthracen-9-yl)ethan-1-ol (8t):**

$^1\text{H}$  NMR (400 MHz,  $\text{CDCl}_3$ )  $\delta$  8.68 (d,  $J = 8.3$  Hz, 2H), 8.40 (s, 1H), 8.01 (d,  $J = 7.4$  Hz, 2H), 7.52 – 7.43 (m, 4H), 6.49 (d,  $J = 6.8$  Hz, 1H), 1.94 (d,  $J = 6.8$  Hz, 3H);  $^{13}\text{C}$  NMR (100 MHz,  $\text{CDCl}_3$ )  $\delta$  157.9, 136.2, 134.2, 129.5, 129.5, 128.9, 127.3, 126.0, 126.0, 125.7, 125.7, 119.1, 105.8, 105.8, 65.7, 55.4

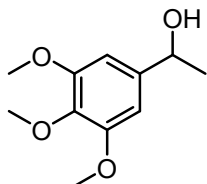

**1-(3,4,5-trimethoxyphenyl)ethan-1-ol (8u):**

$^1\text{H}$  NMR (400 MHz,  $\text{CDCl}_3$ )  $\delta$  6.56 (s, 2H), 4.79 (q,  $J = 6.4$  Hz, 1H), 3.83 (s, 6H), 3.79 (s, 3H), 1.45 (d,  $J = 6.4$  Hz, 3H);  $^{13}\text{C}$  NMR (100 MHz,  $\text{CDCl}_3$ )  $\delta$  153.2, 153.2, 141.9, 136.9, 102.2, 102.2, 70.5, 60.8, 56.1, 56.1, 25.3.

### 3) NMR spectra of starting materials:

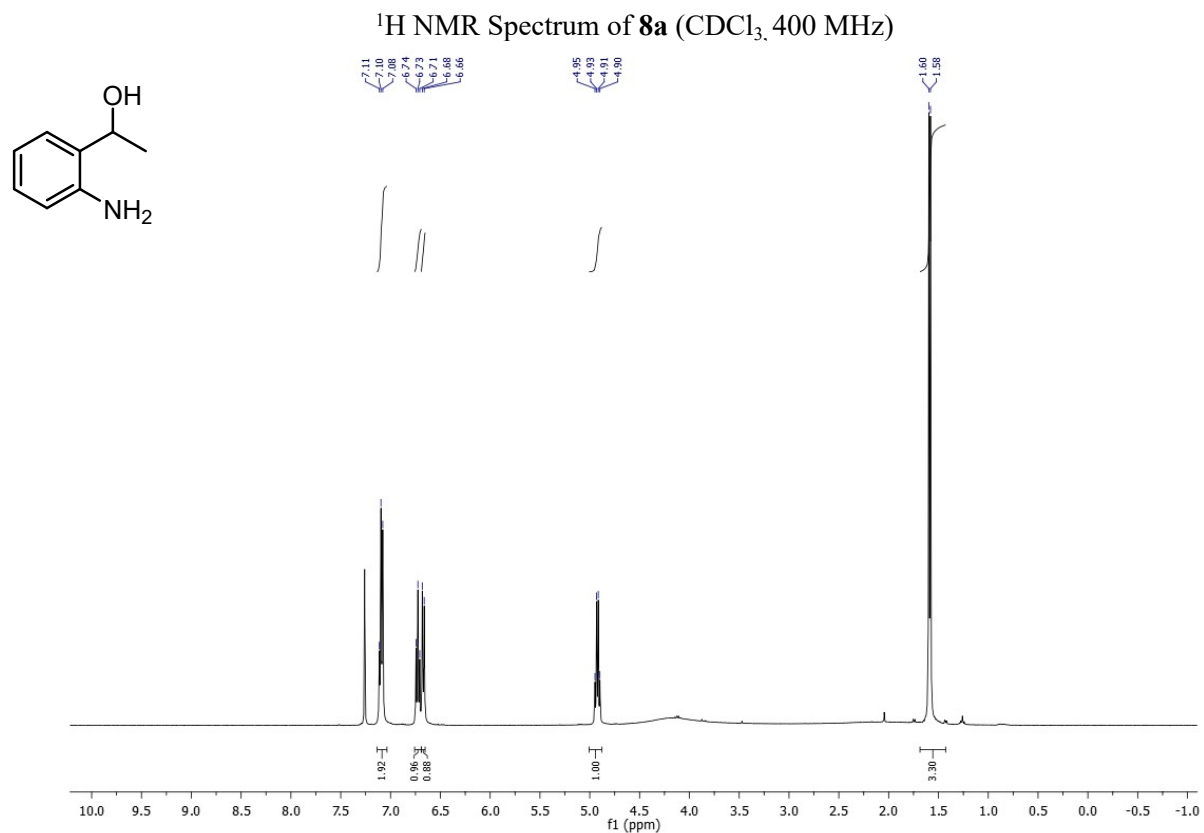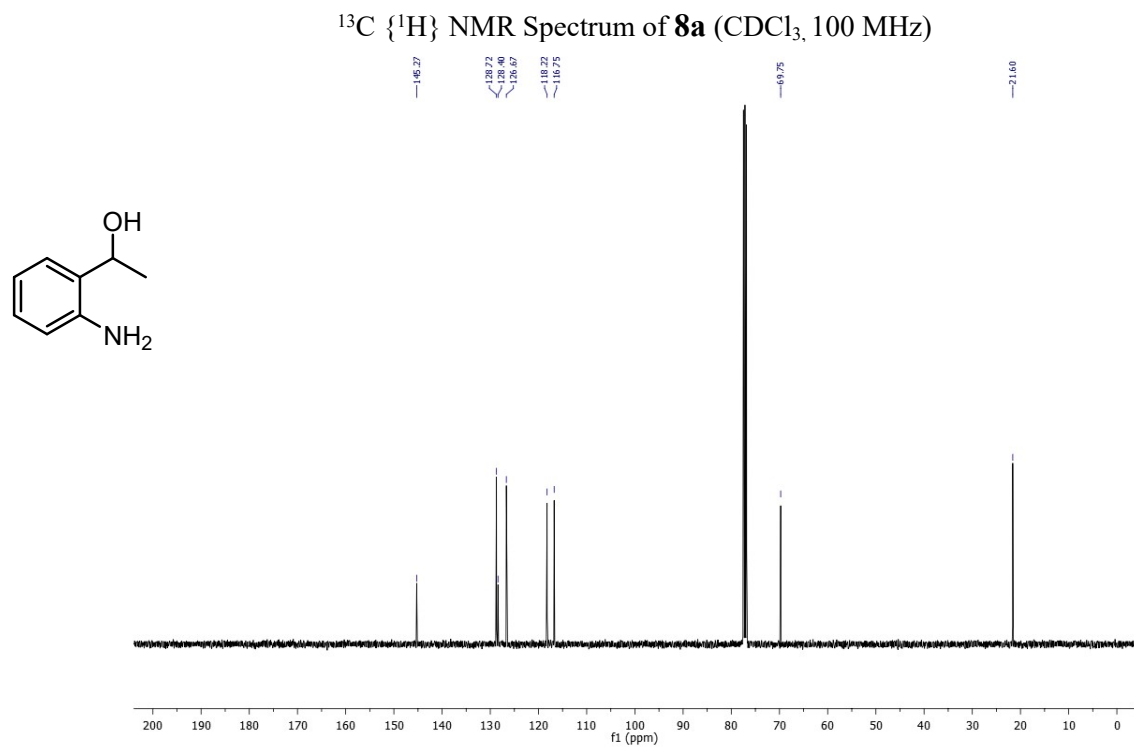



<sup>1</sup>H NMR Spectrum of **8b** (CDCl<sub>3</sub>, 400 MHz)

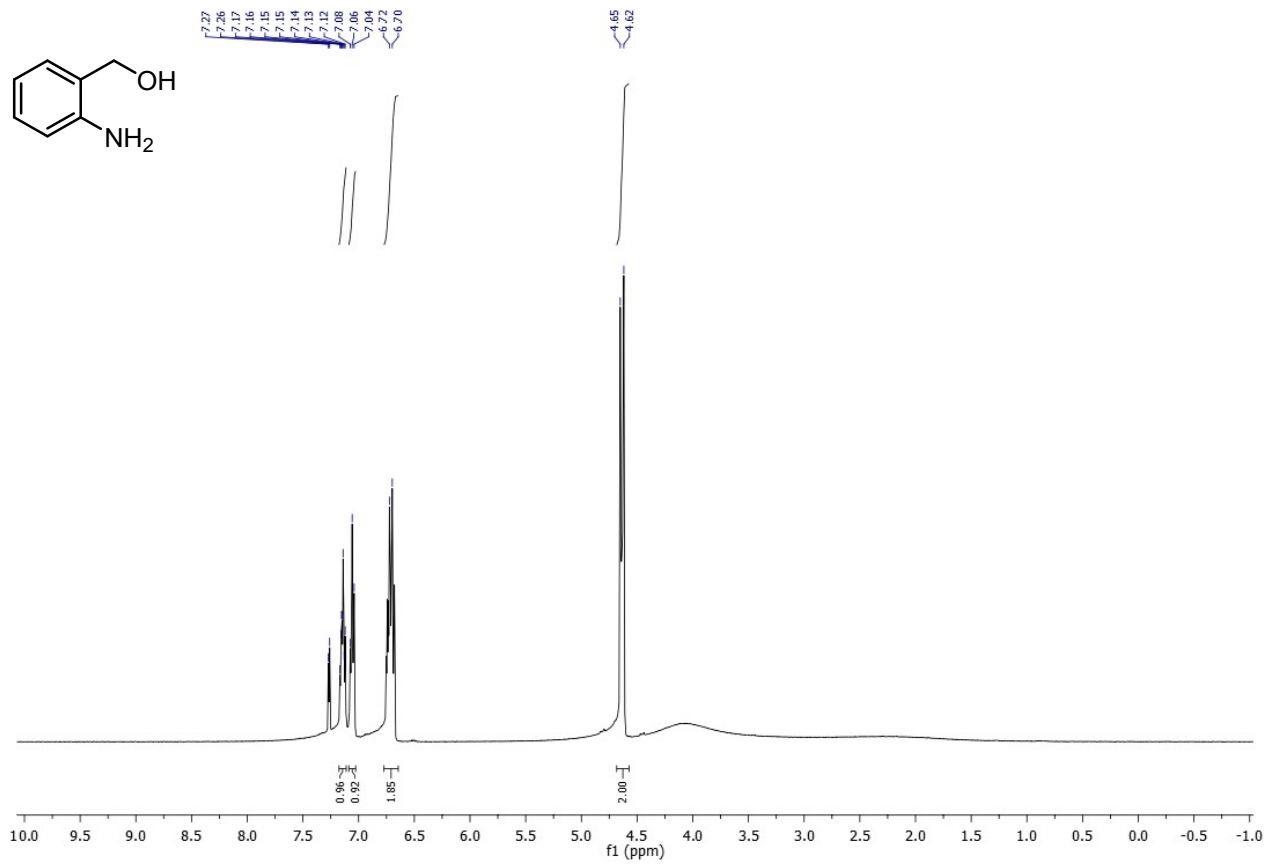

<sup>13</sup>C {<sup>1</sup>H} NMR Spectrum of **8b** (CDCl<sub>3</sub>, 100 MHz)

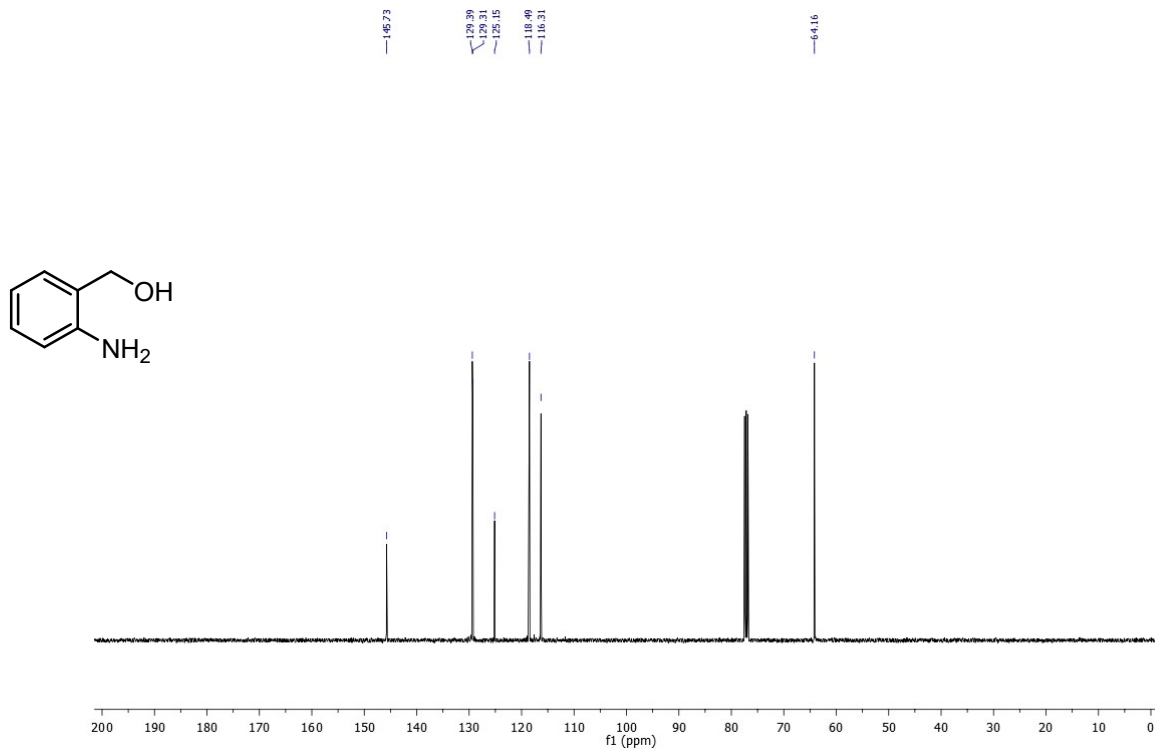

<sup>1</sup>H NMR Spectrum of **8c** (CDCl<sub>3</sub>, 400 MHz)

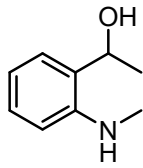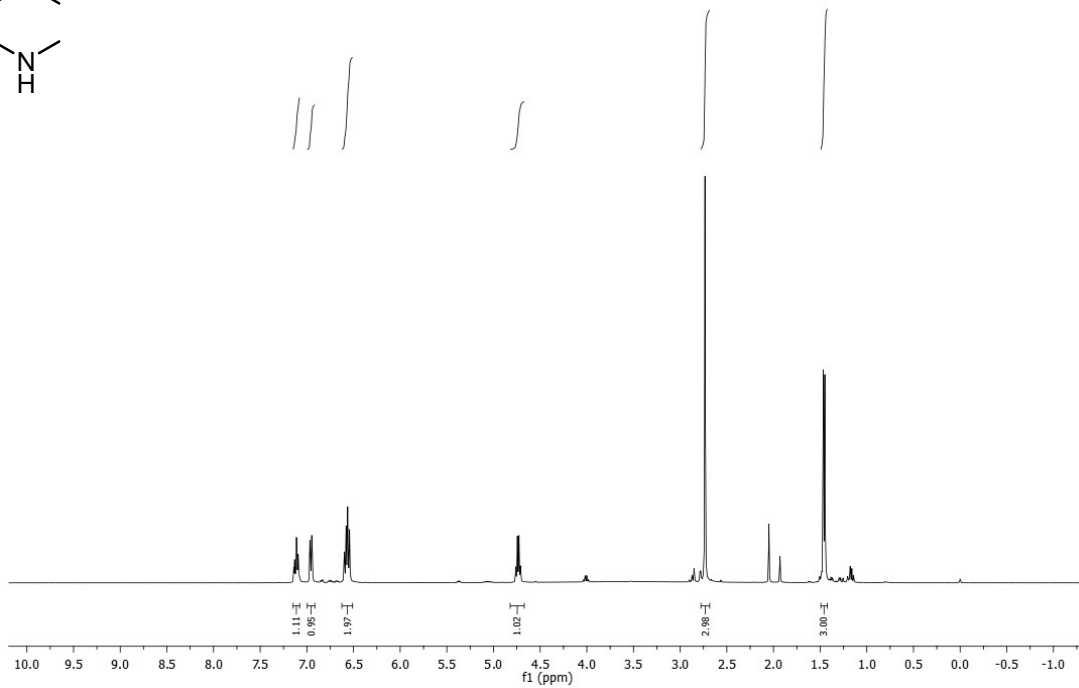

<sup>13</sup>C {<sup>1</sup>H} NMR Spectrum of **8c** (CDCl<sub>3</sub>, 100 MHz)

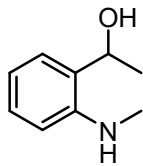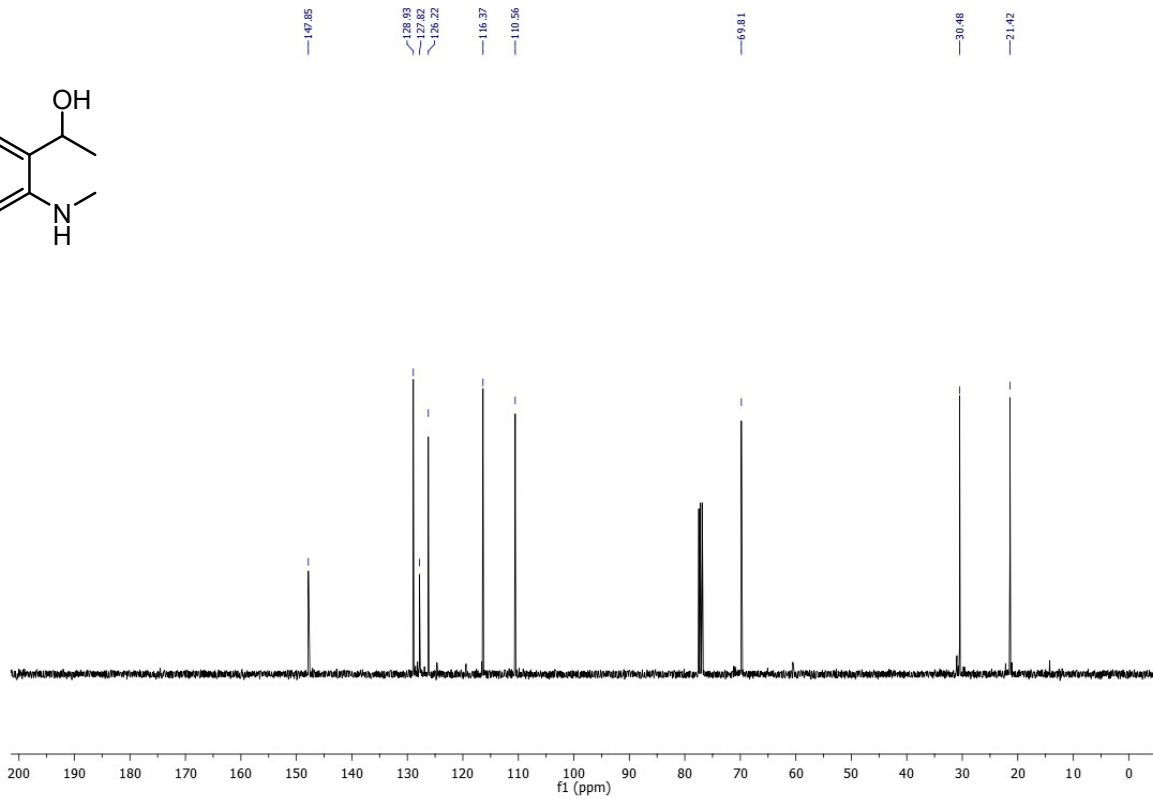

<sup>1</sup>H NMR Spectrum of **8d** (CDCl<sub>3</sub>, 400 MHz)

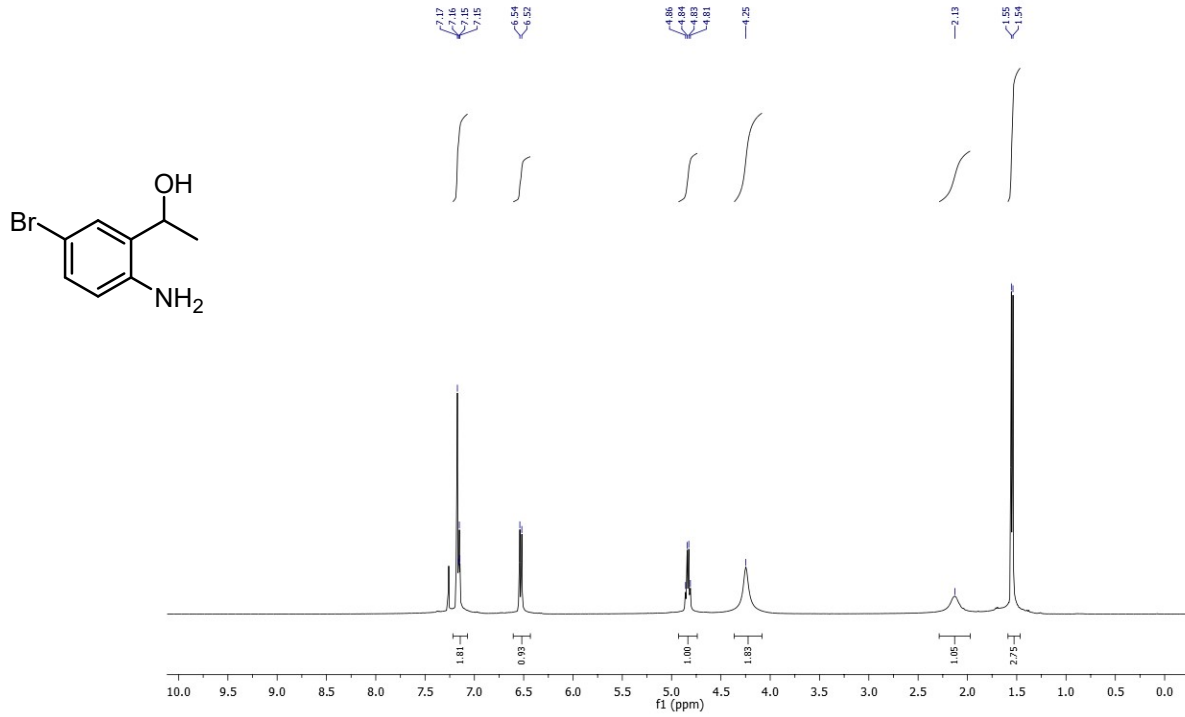

<sup>13</sup>C {<sup>1</sup>H} NMR Spectrum of **8d** (CDCl<sub>3</sub>, 100 MHz)

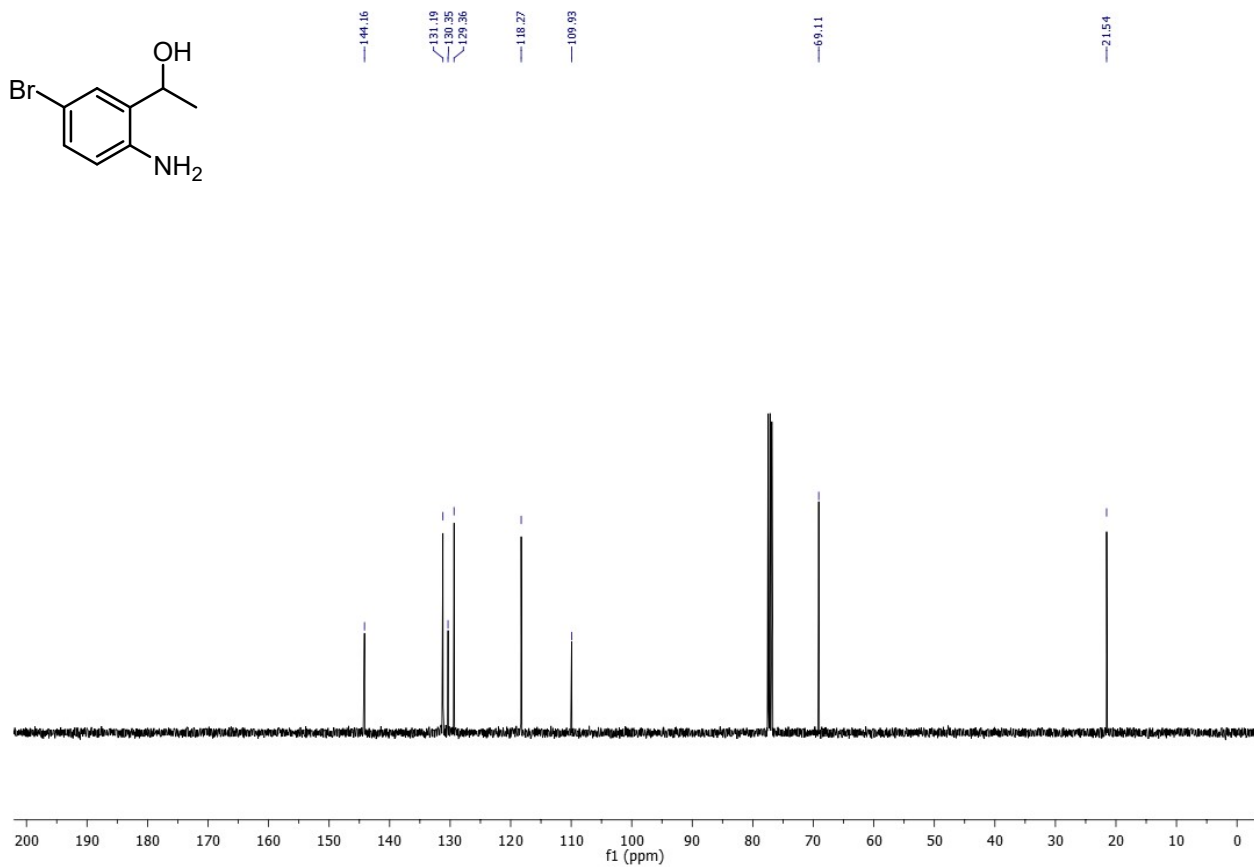

<sup>1</sup>H NMR Spectrum of **8e** (CDCl<sub>3</sub>, 400 MHz)

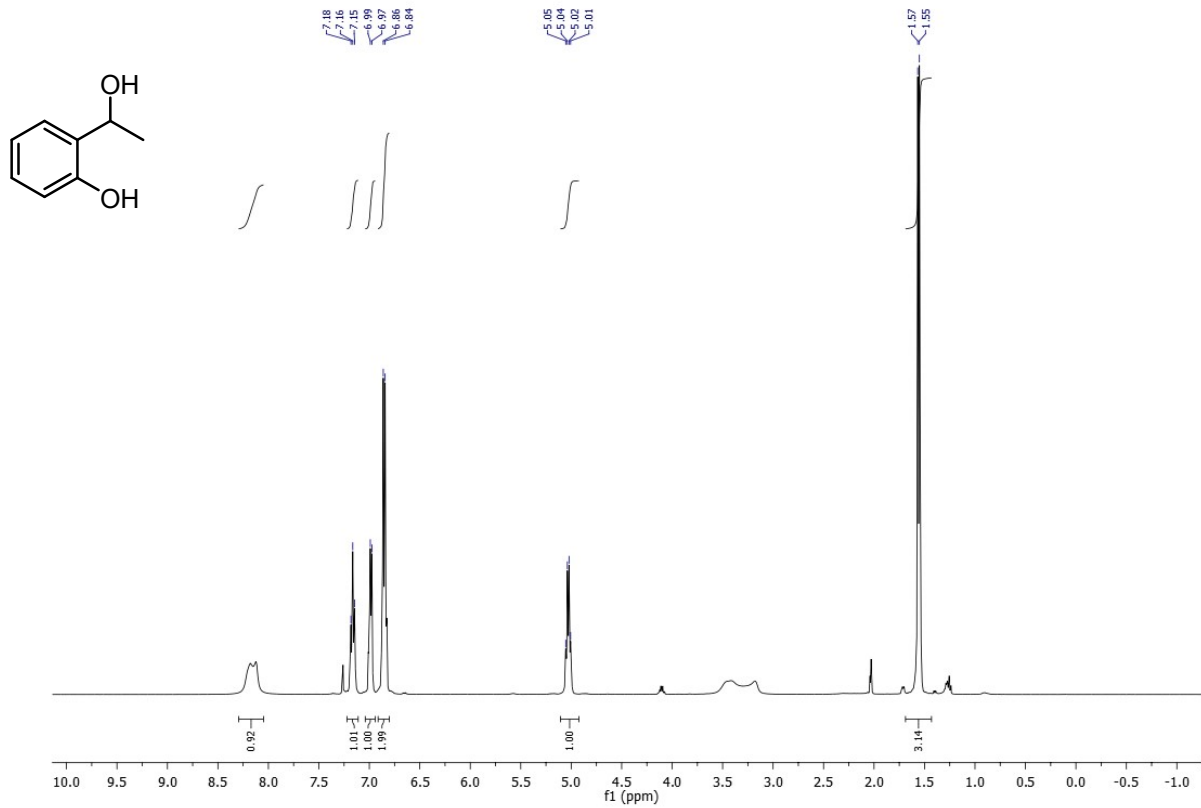

<sup>13</sup>C {<sup>1</sup>H} NMR Spectrum of **8e** (CDCl<sub>3</sub>, 100 MHz)

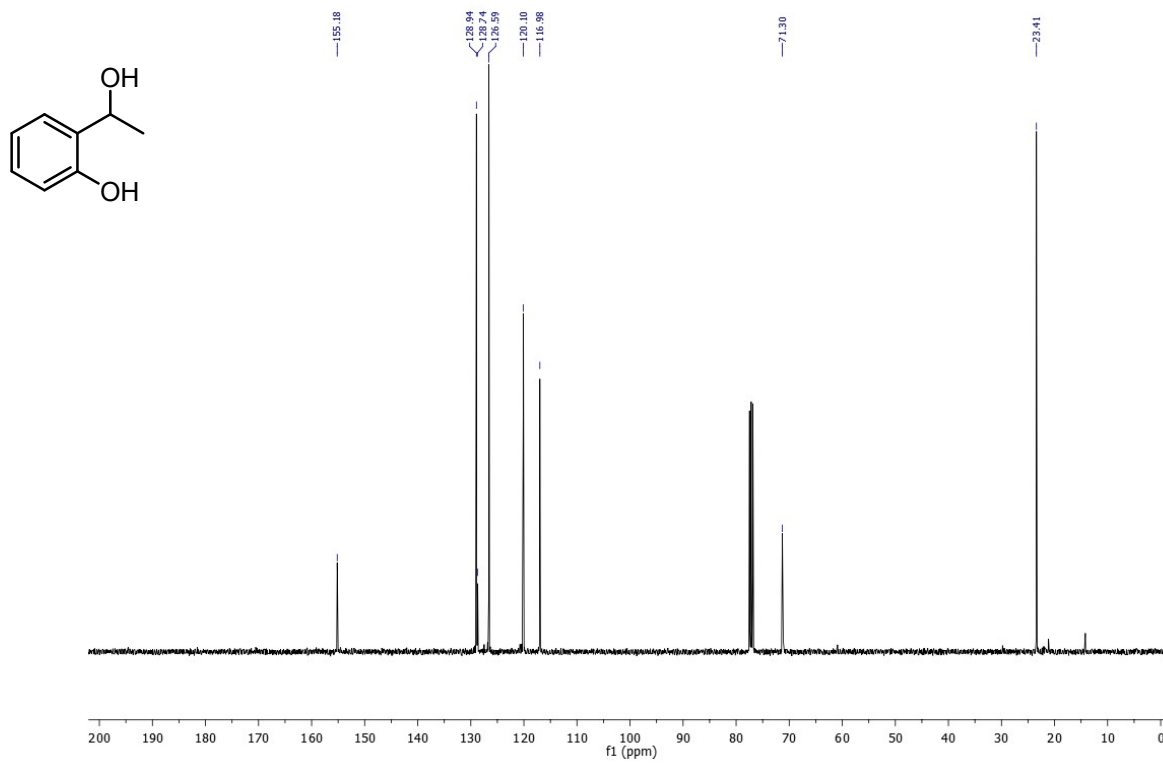

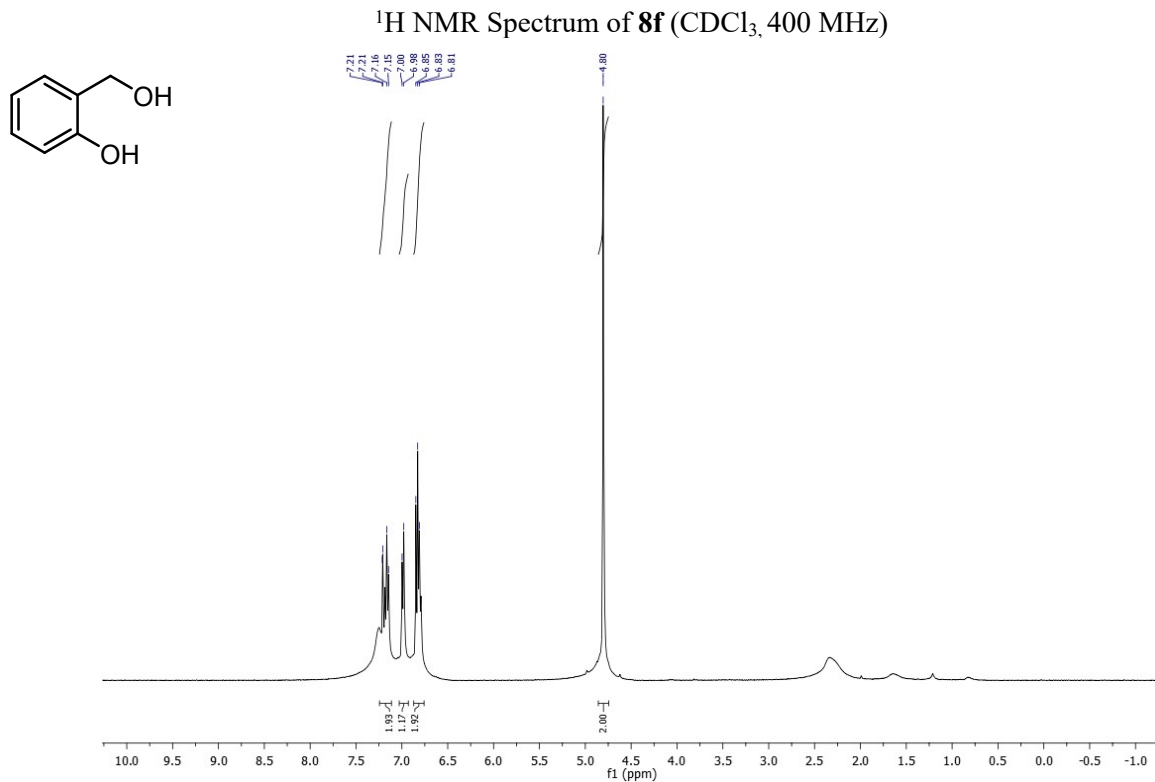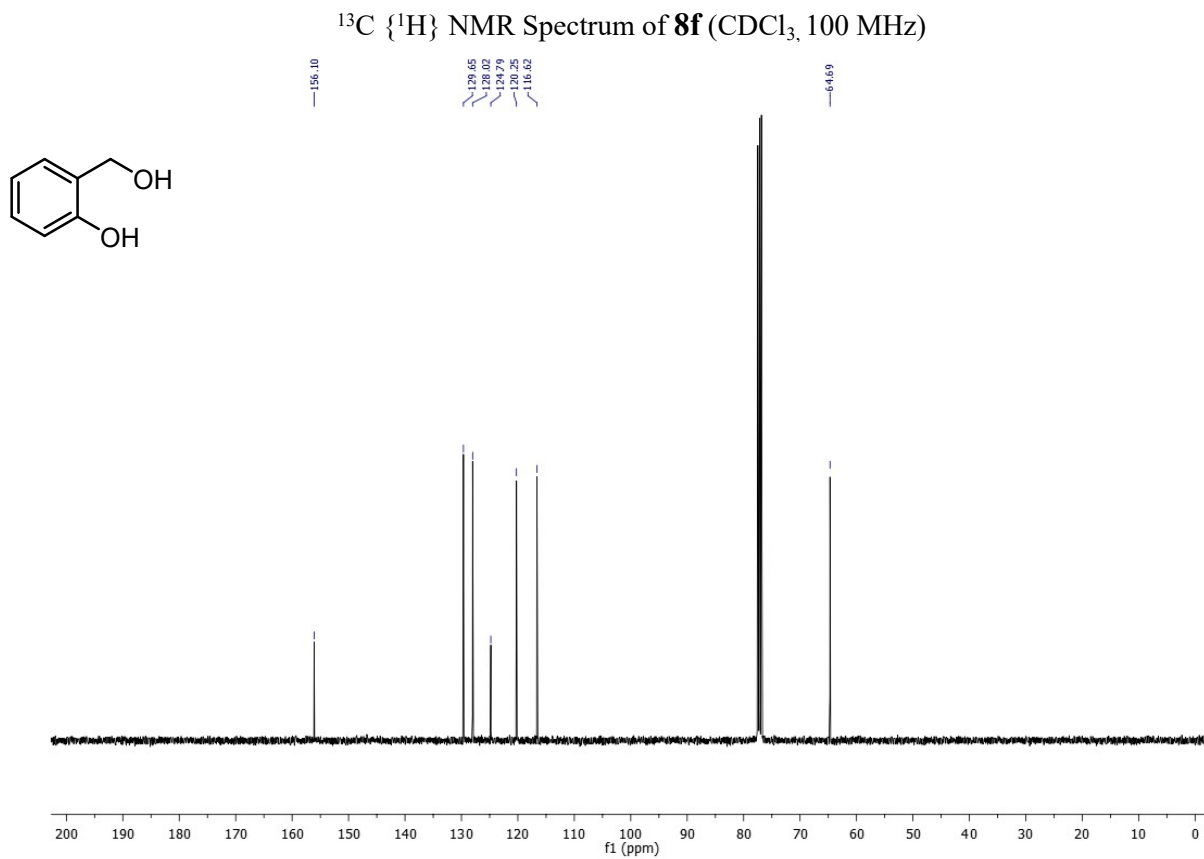

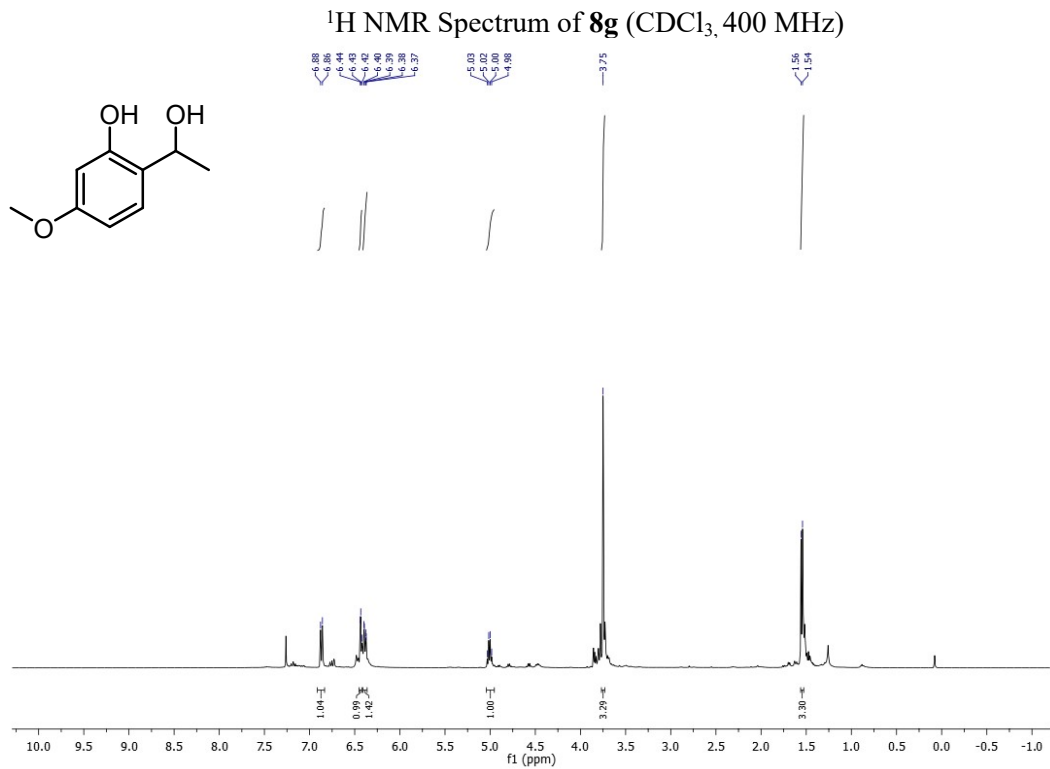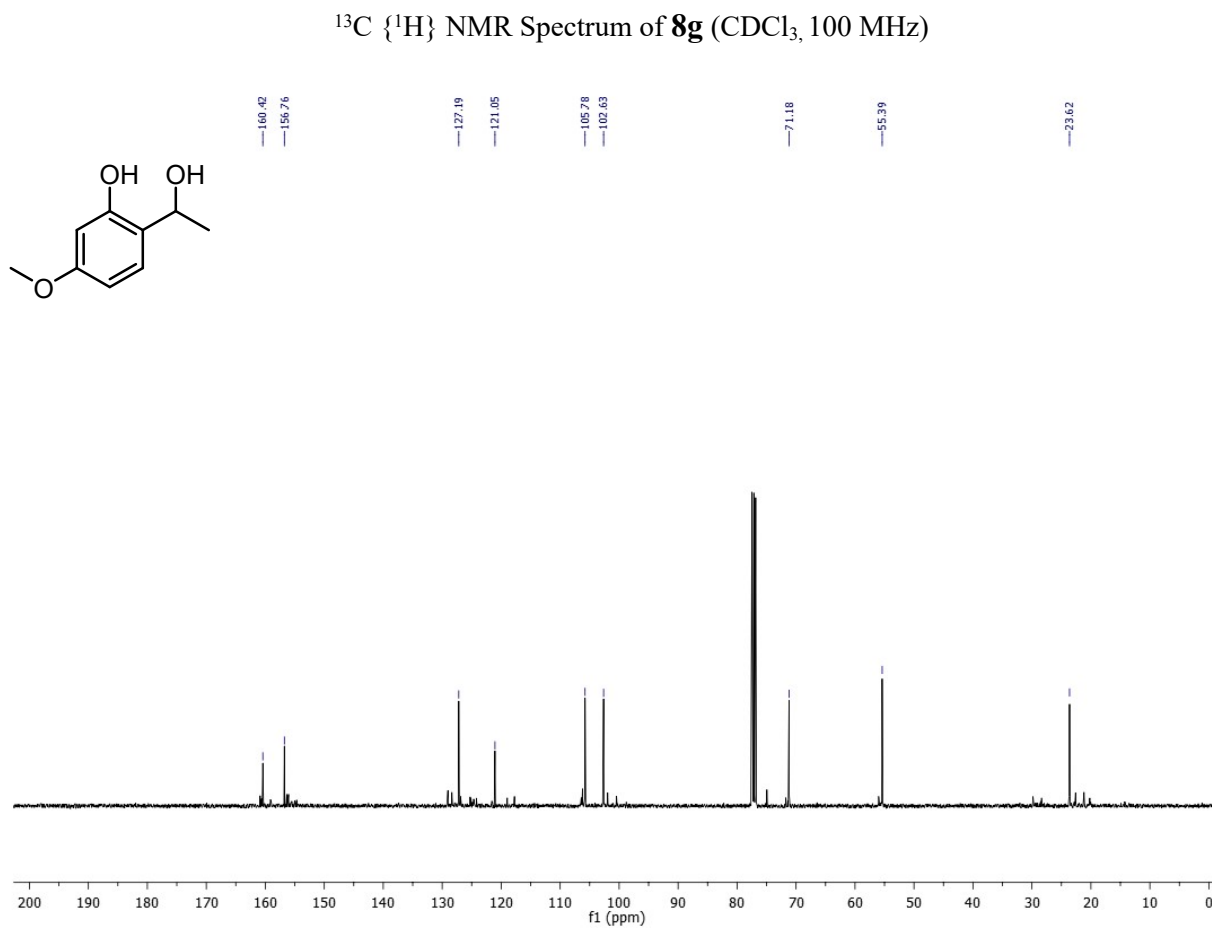

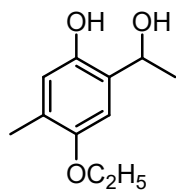

<sup>1</sup>H NMR Spectrum of **8h** (CDCl<sub>3</sub>, 400 MHz)

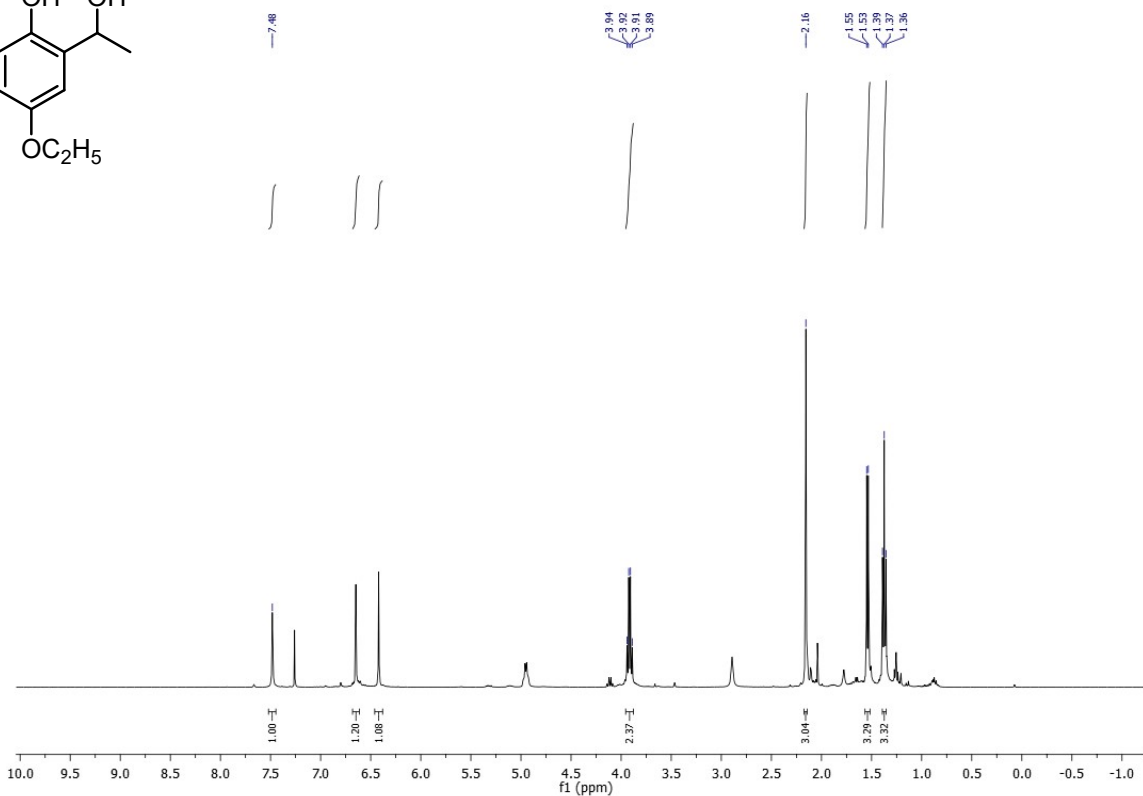

<sup>13</sup>C {<sup>1</sup>H} NMR Spectrum of **8h** (CDCl<sub>3</sub>, 100 MHz)

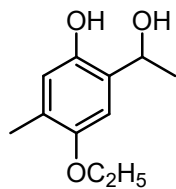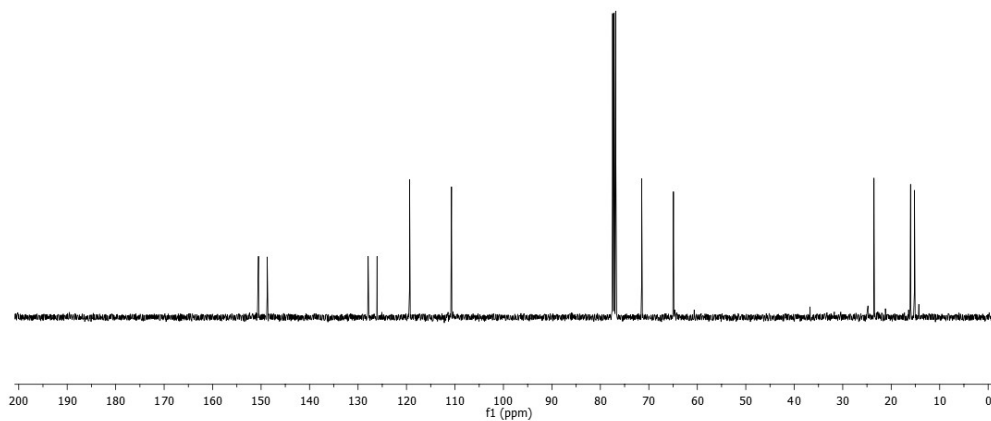

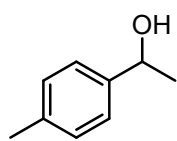

$^1\text{H}$  NMR Spectrum of **8i** ( $\text{CDCl}_3$ , 400 MHz)

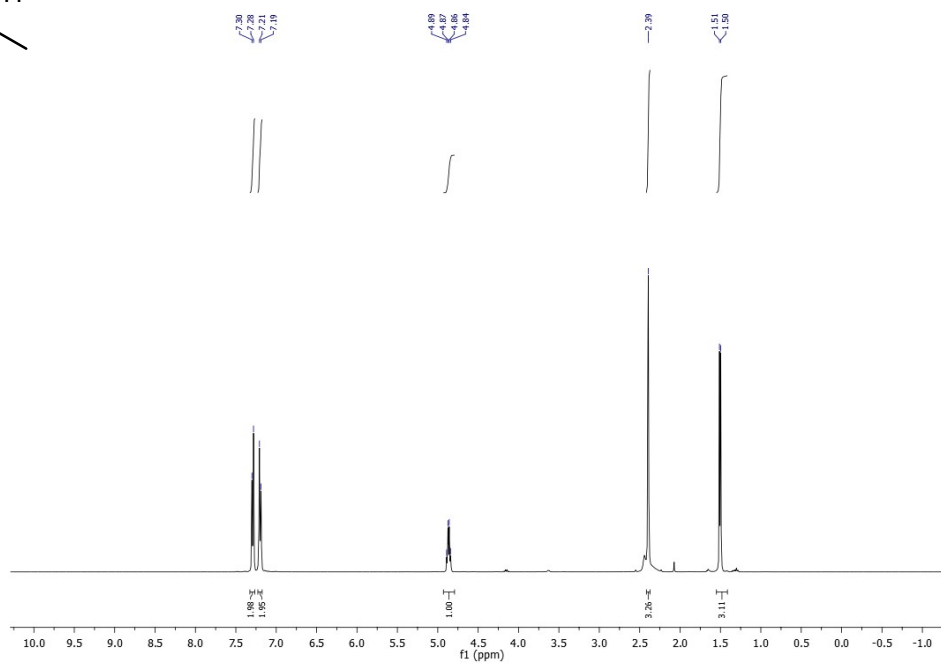

$^{13}\text{C}$   $\{^1\text{H}\}$  NMR Spectrum of **8i** ( $\text{CDCl}_3$ , 100 MHz)

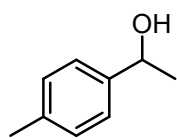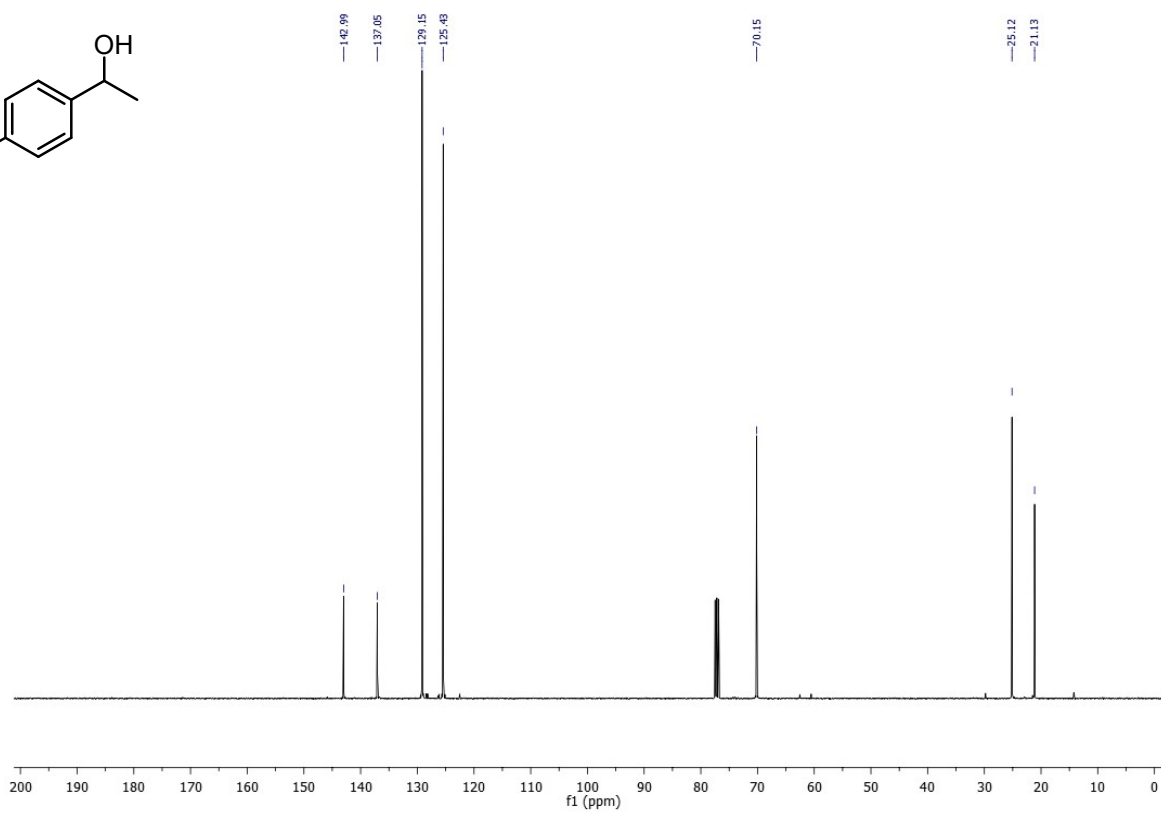



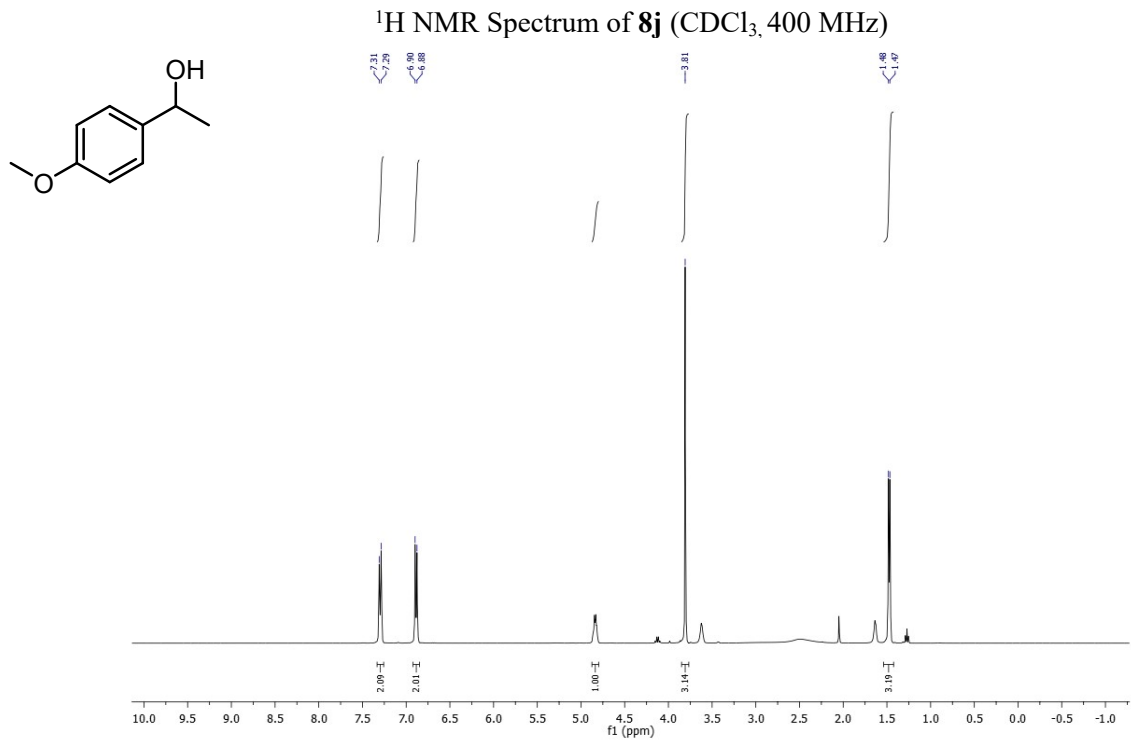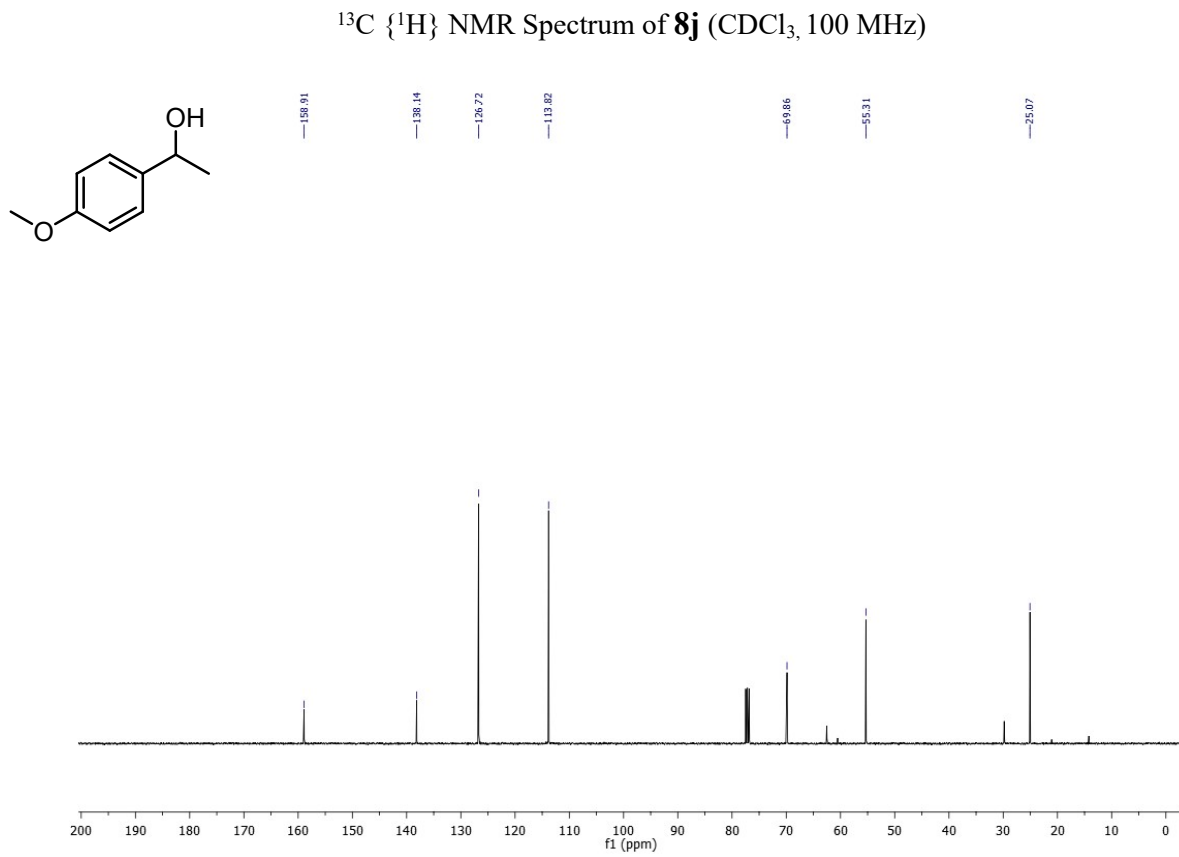

<sup>1</sup>H NMR Spectrum of **8k** (CDCl<sub>3</sub>, 400 MHz)

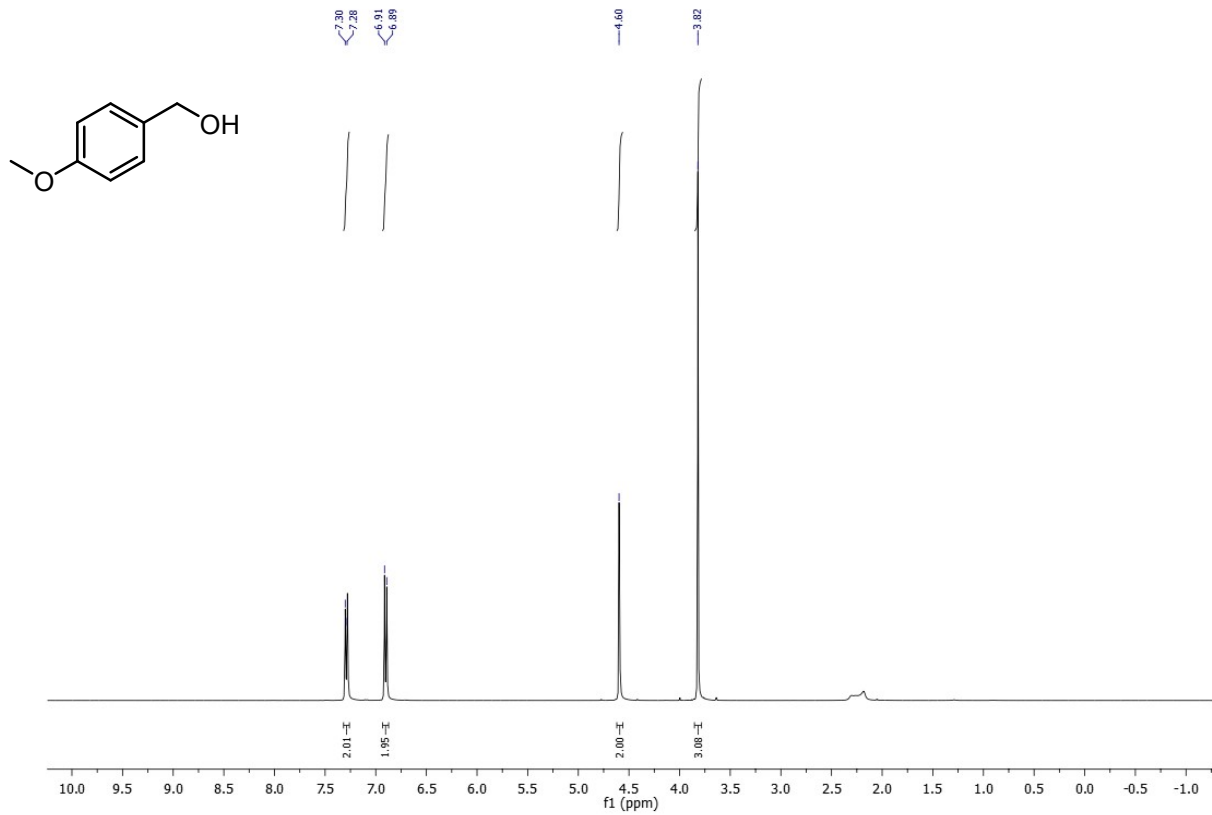

<sup>13</sup>C {<sup>1</sup>H} NMR Spectrum of **8k** (CDCl<sub>3</sub>, 100 MHz)

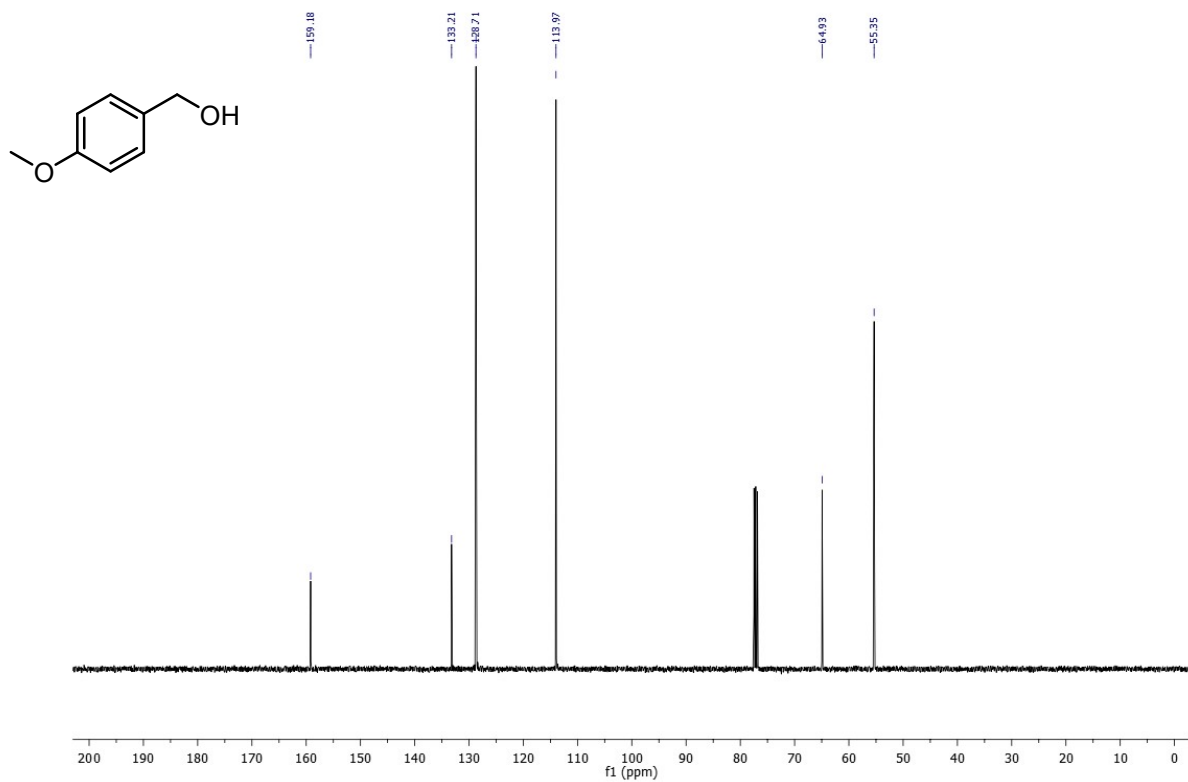

<sup>1</sup>H NMR Spectrum of **81** (CDCl<sub>3</sub>, 400 MHz)

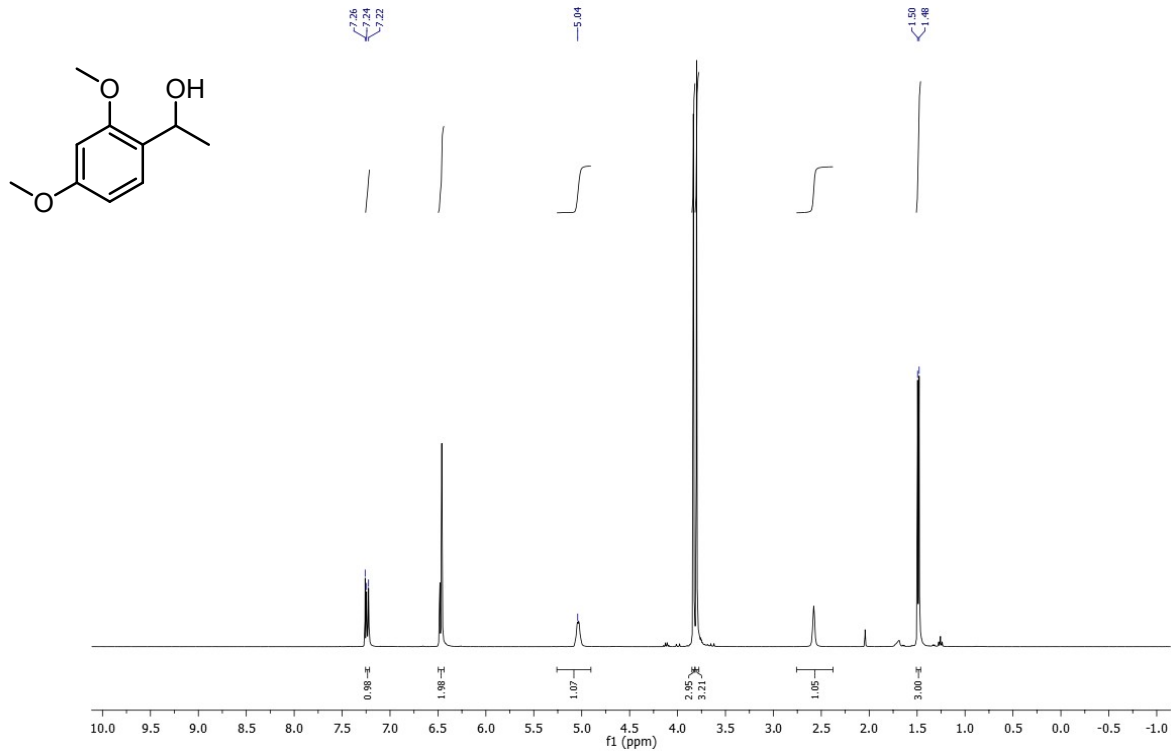

<sup>13</sup>C {<sup>1</sup>H} NMR Spectrum of **81** (CDCl<sub>3</sub>, 100 MHz)

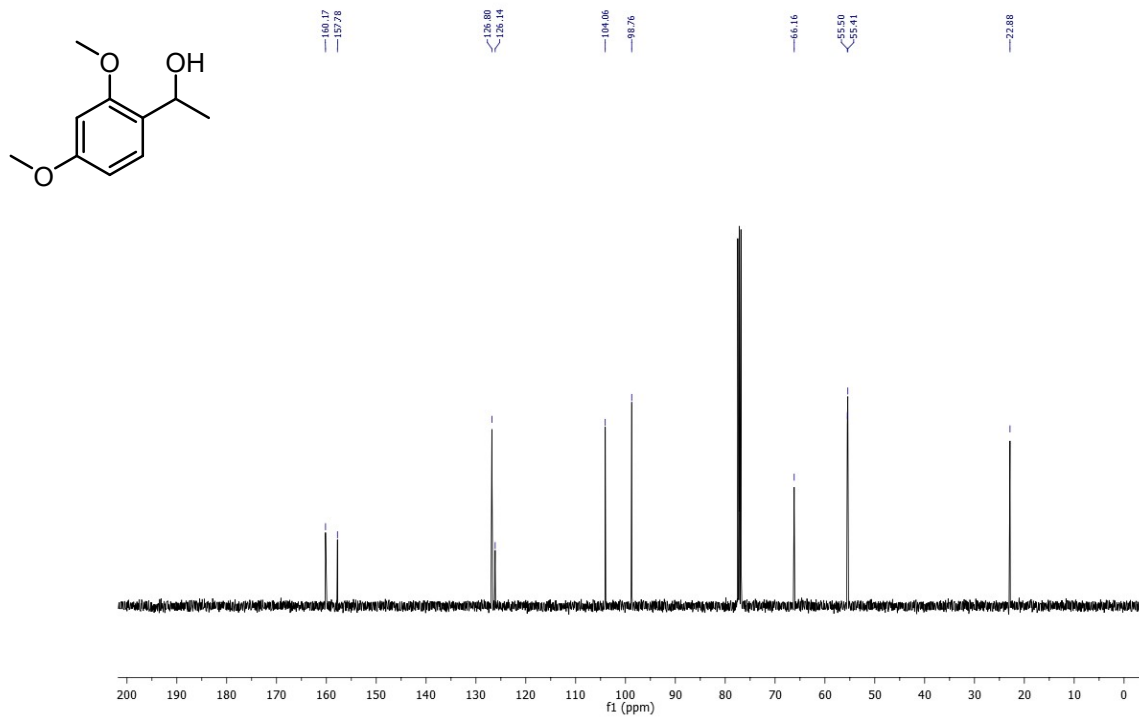

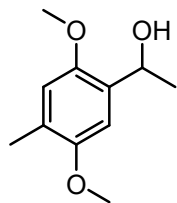

<sup>1</sup>H NMR Spectrum of **8m** (CDCl<sub>3</sub>, 400 MHz)

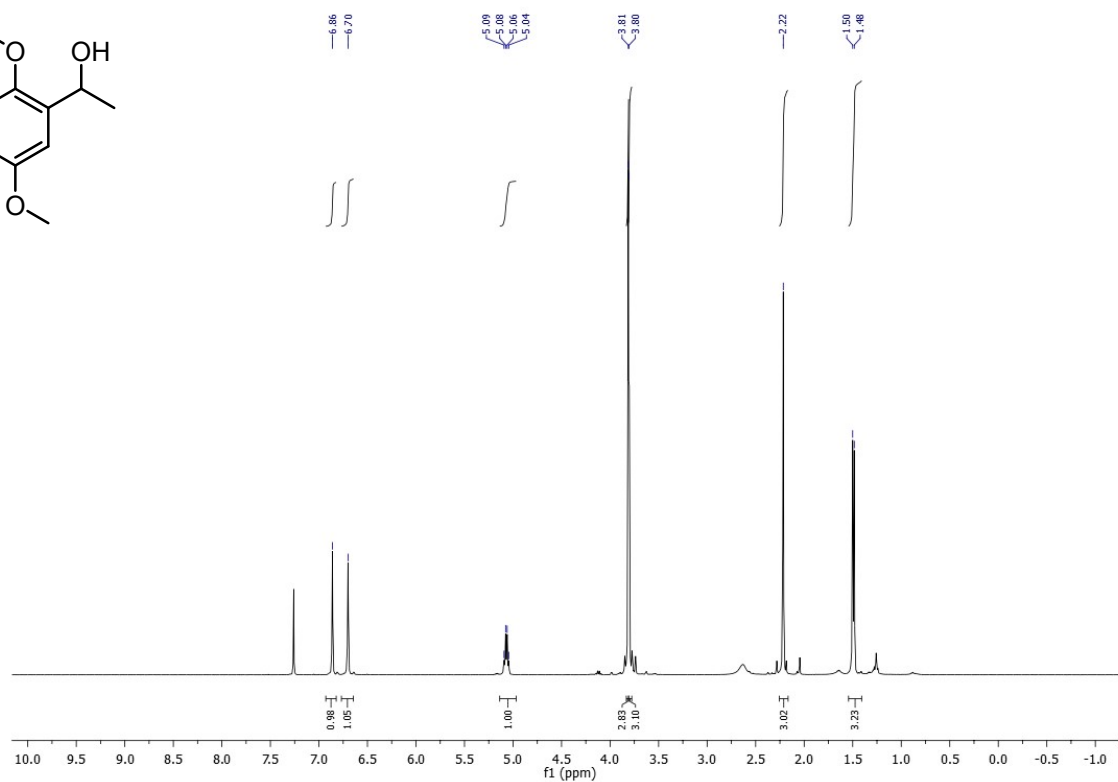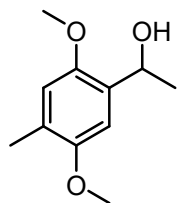

<sup>13</sup>C {<sup>1</sup>H} NMR Spectrum of **8m** (CDCl<sub>3</sub>, 100 MHz)

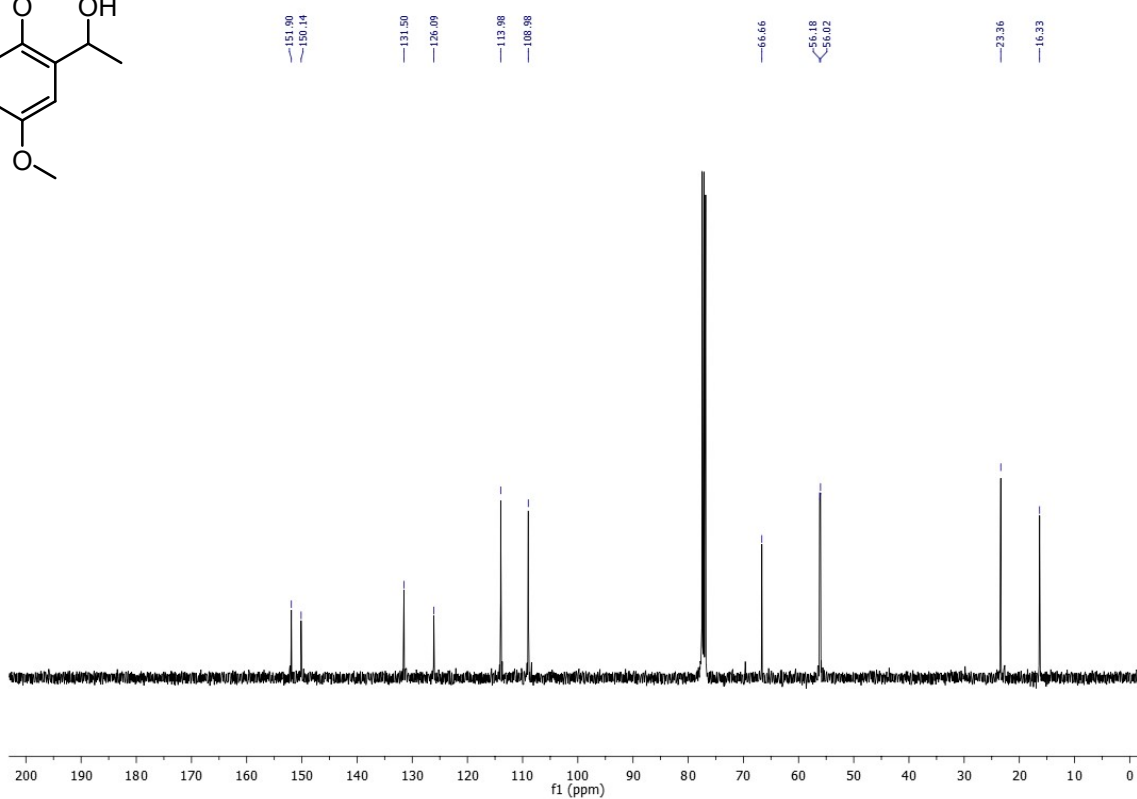

<sup>1</sup>H NMR Spectrum of **8n** (CDCl<sub>3</sub>, 400 MHz)

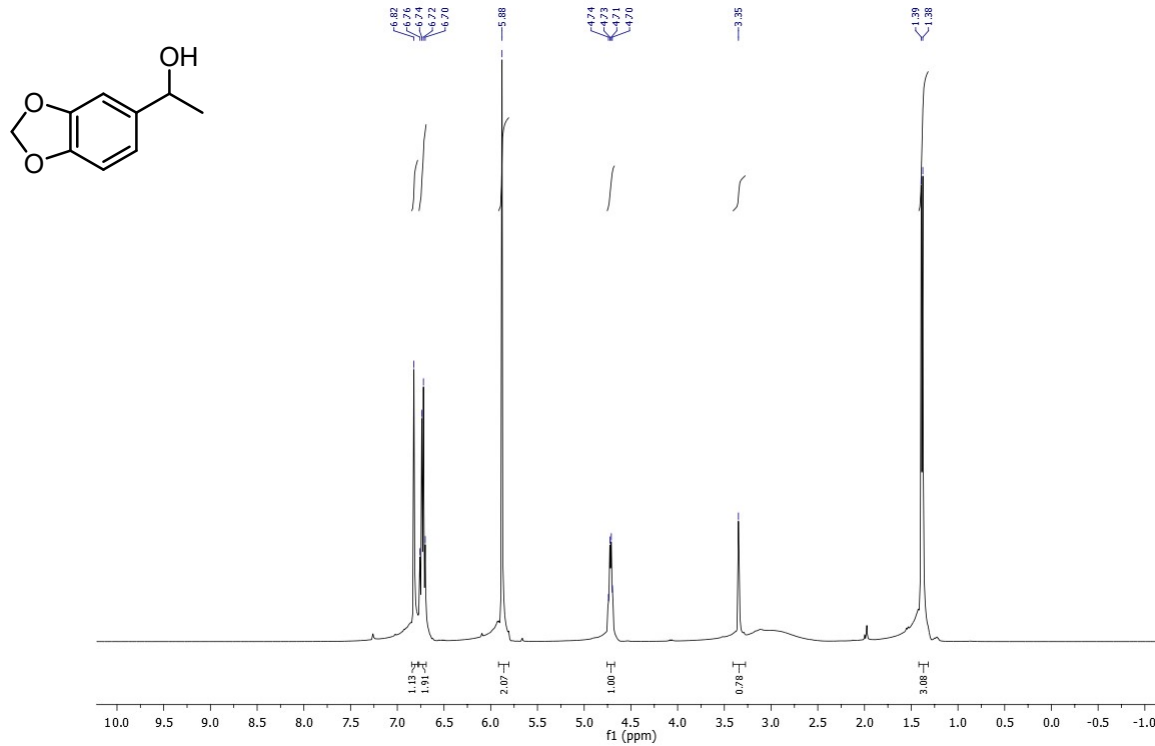

<sup>13</sup>C {<sup>1</sup>H} NMR Spectrum of **8n** (CDCl<sub>3</sub>, 100 MHz)

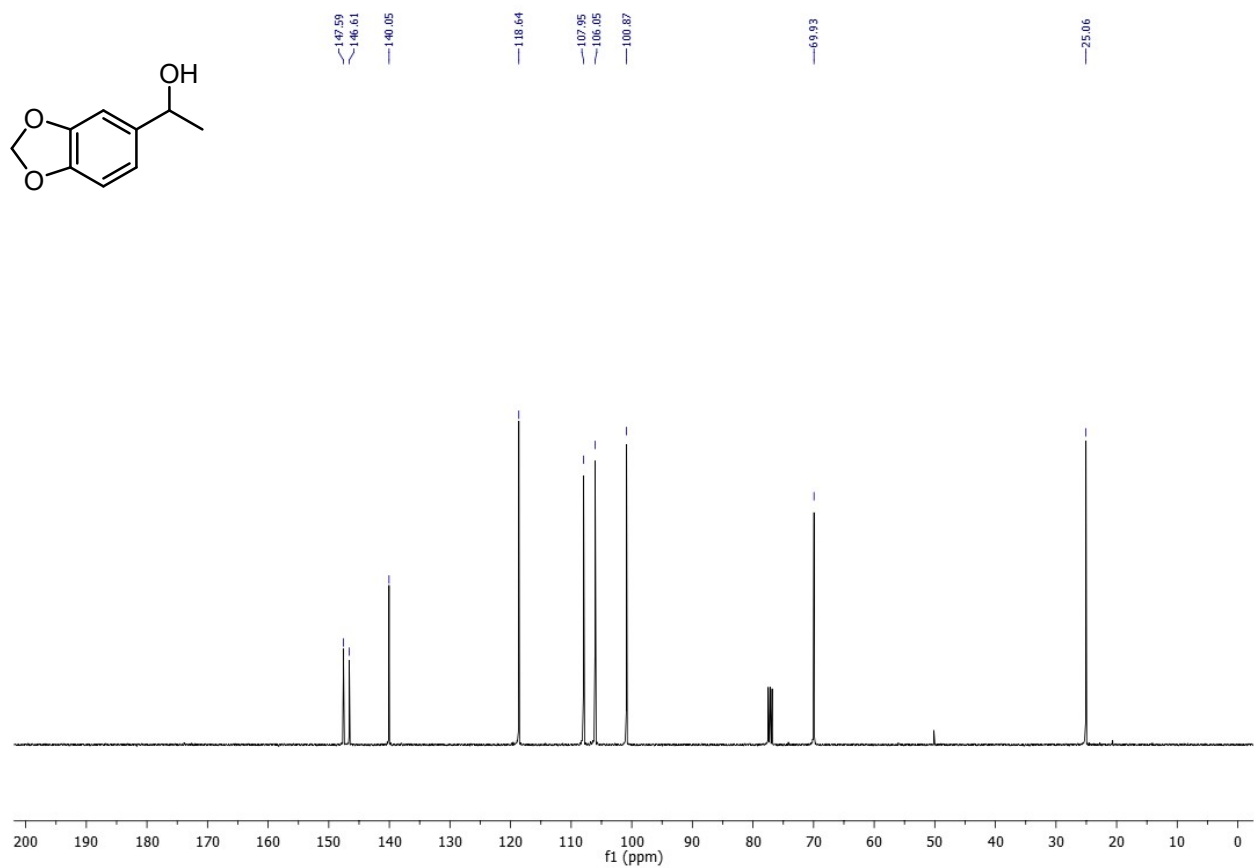

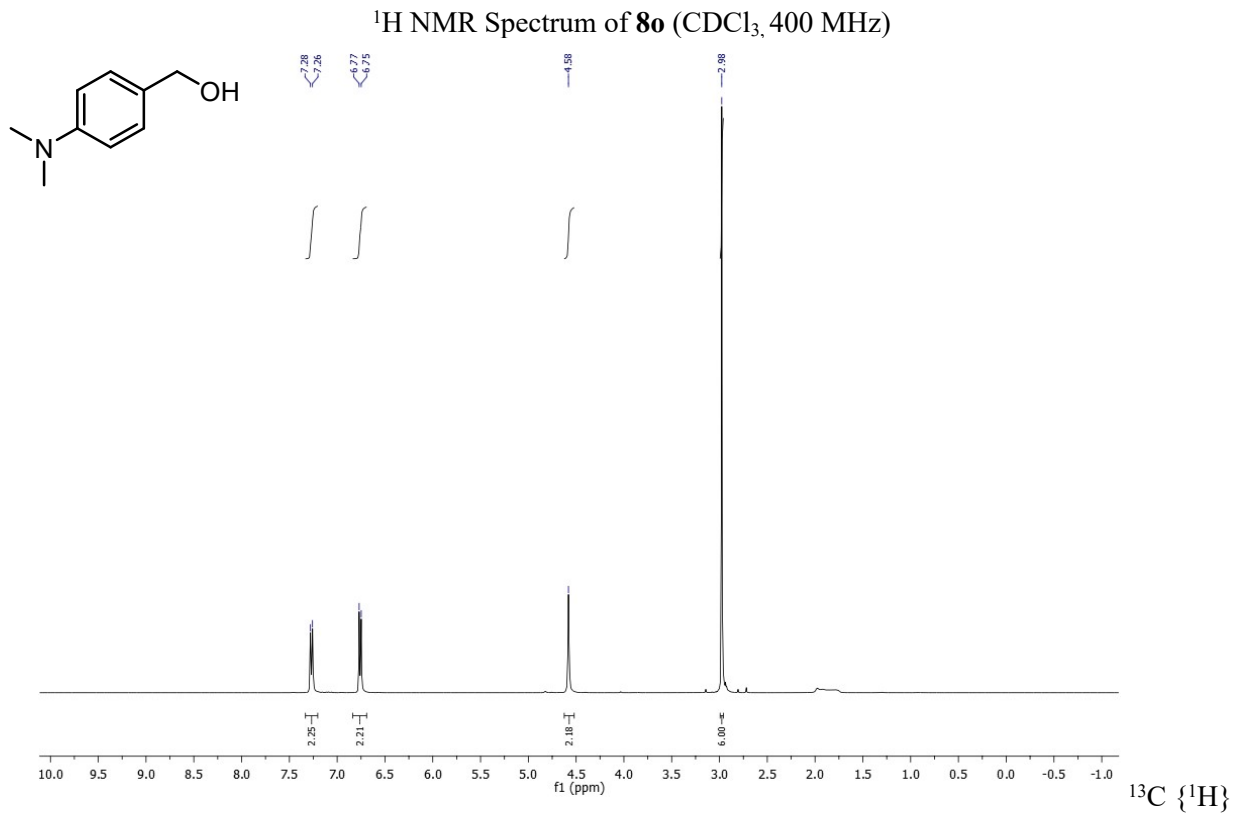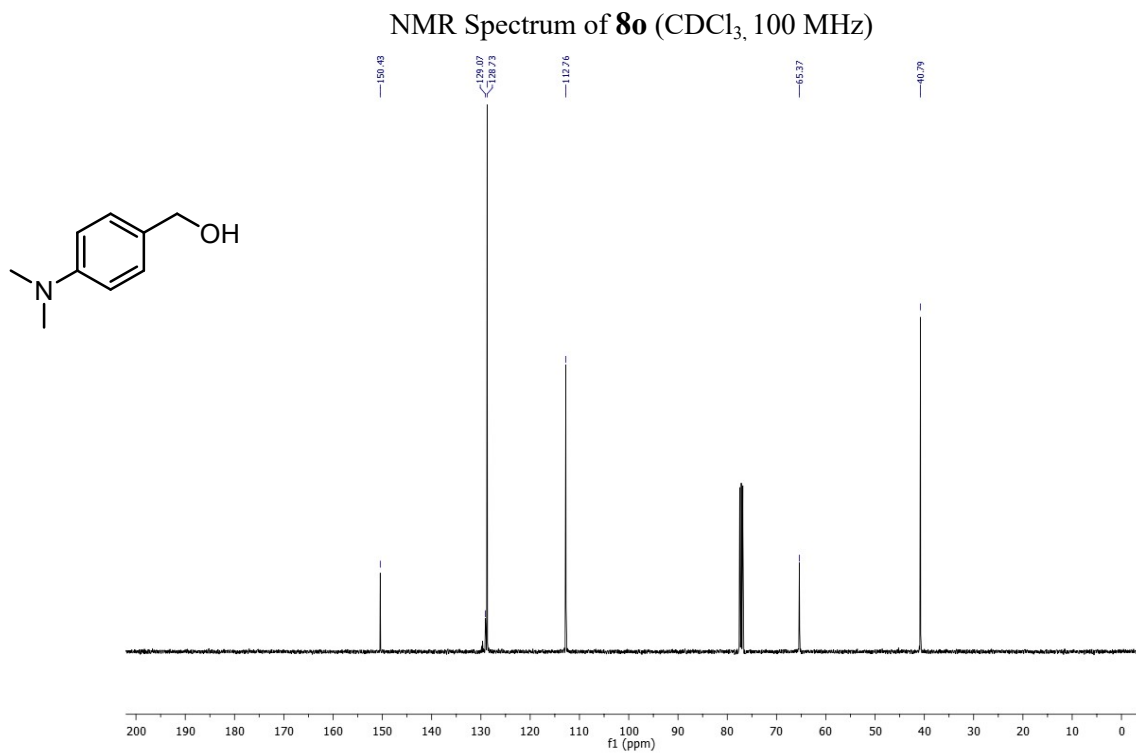

<sup>1</sup>H NMR Spectrum of **8p** (CDCl<sub>3</sub>, 400 MHz)

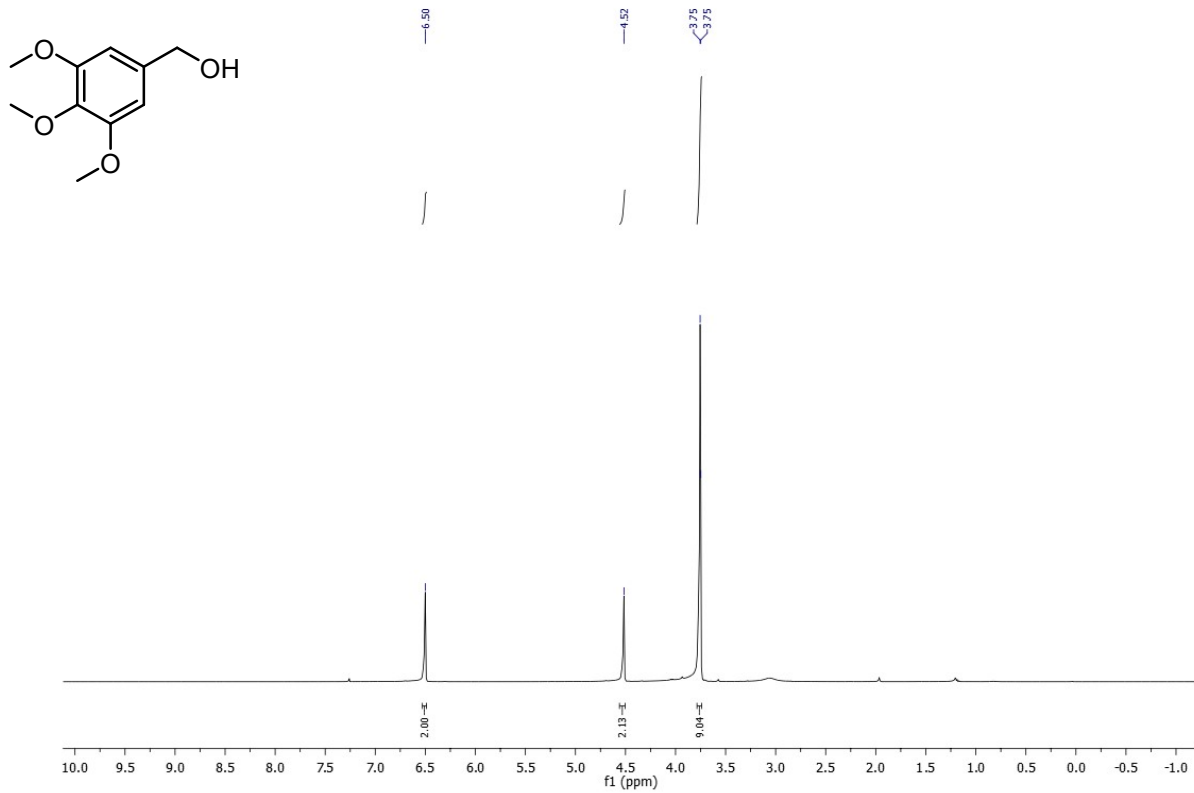

<sup>13</sup>C {<sup>1</sup>H} NMR Spectrum of **8p** (CDCl<sub>3</sub>, 100 MHz)

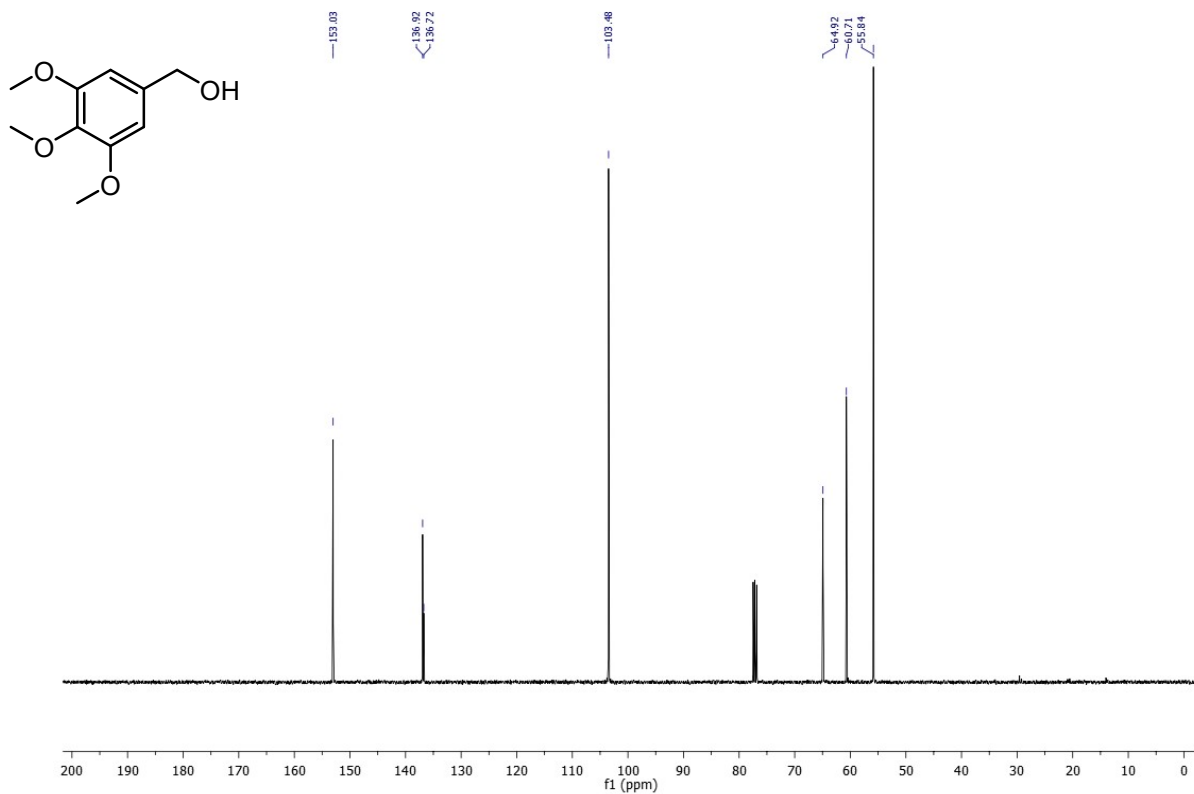

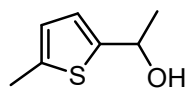

$^1\text{H}$  NMR Spectrum of **8q** ( $\text{CDCl}_3$ , 400 MHz)

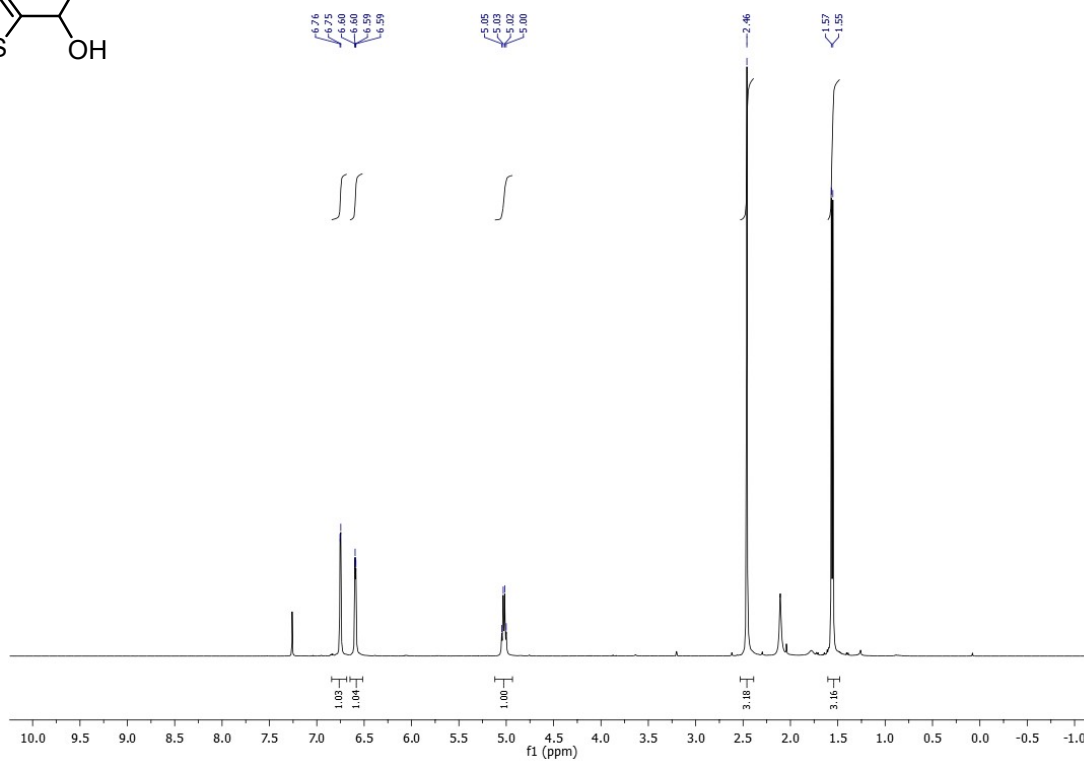

$^{13}\text{C}$   $\{^1\text{H}\}$  NMR Spectrum of **8q** ( $\text{CDCl}_3$ , 100 MHz)

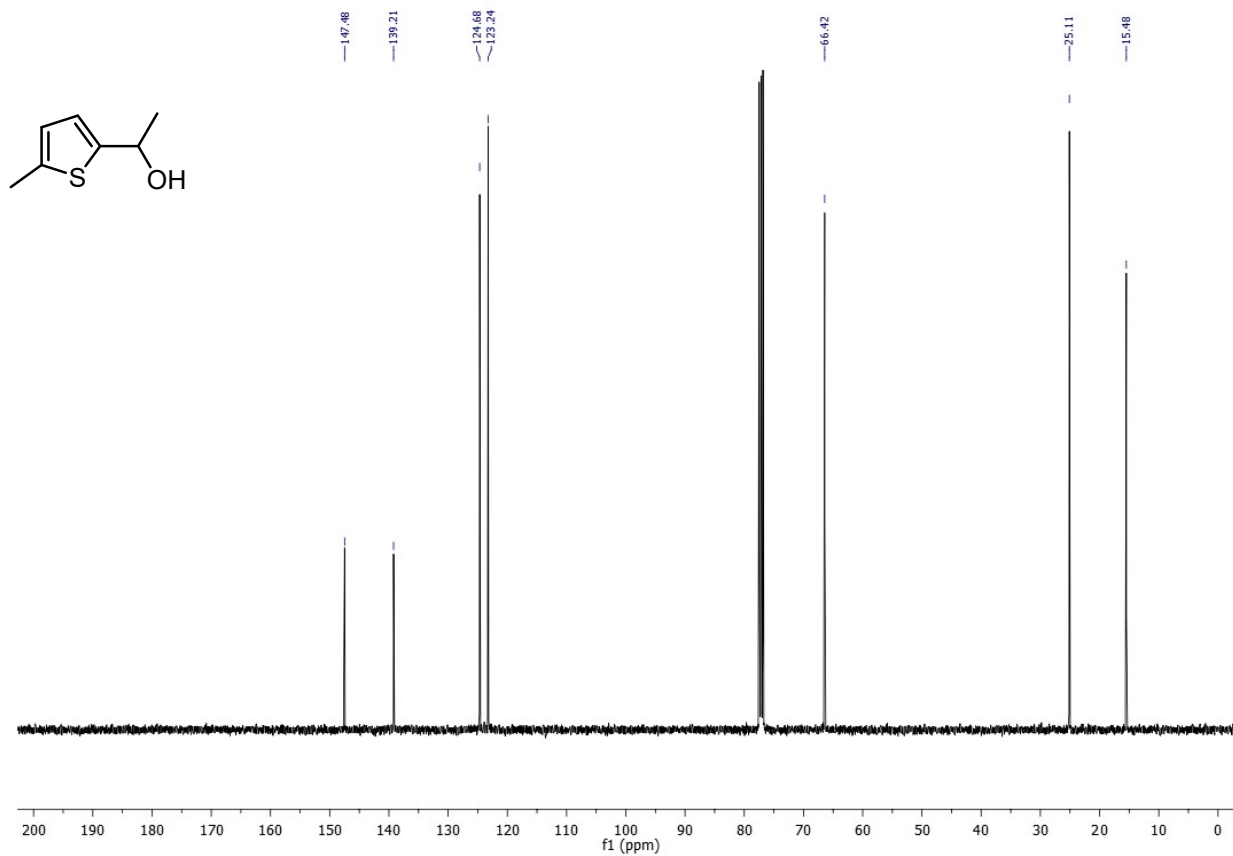





<sup>1</sup>H NMR Spectrum of **8s** (CDCl<sub>3</sub>, 400 MHz)

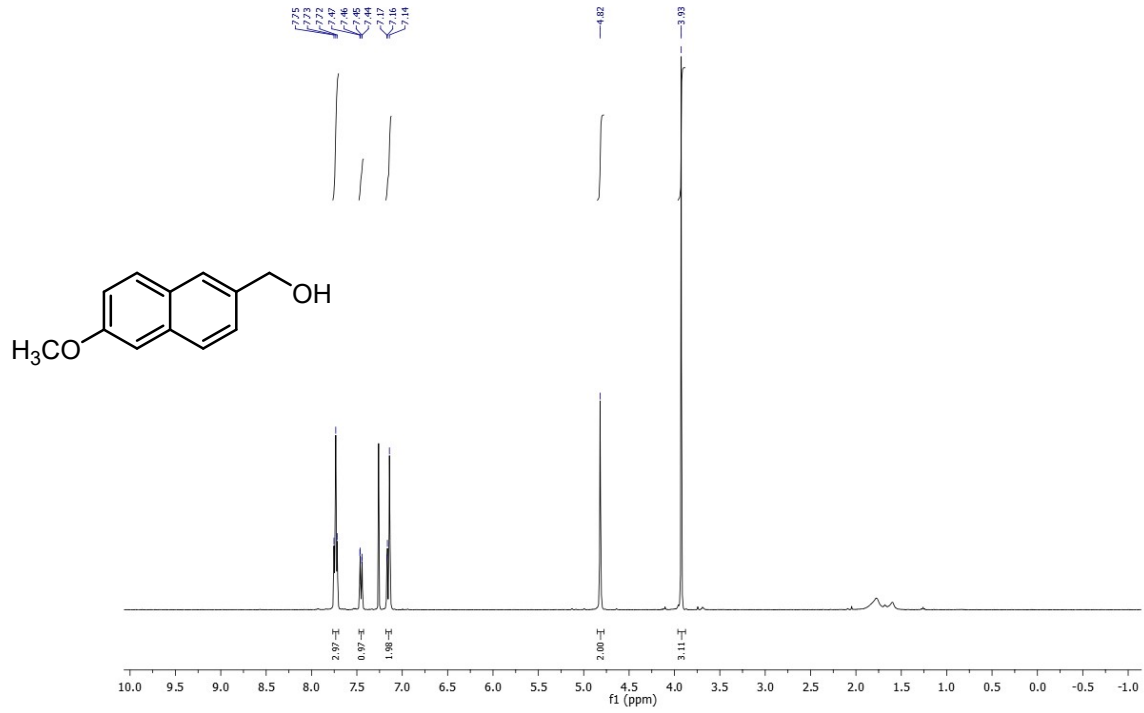

<sup>13</sup>C {<sup>1</sup>H} NMR Spectrum of **8s** (CDCl<sub>3</sub>, 100 MHz)

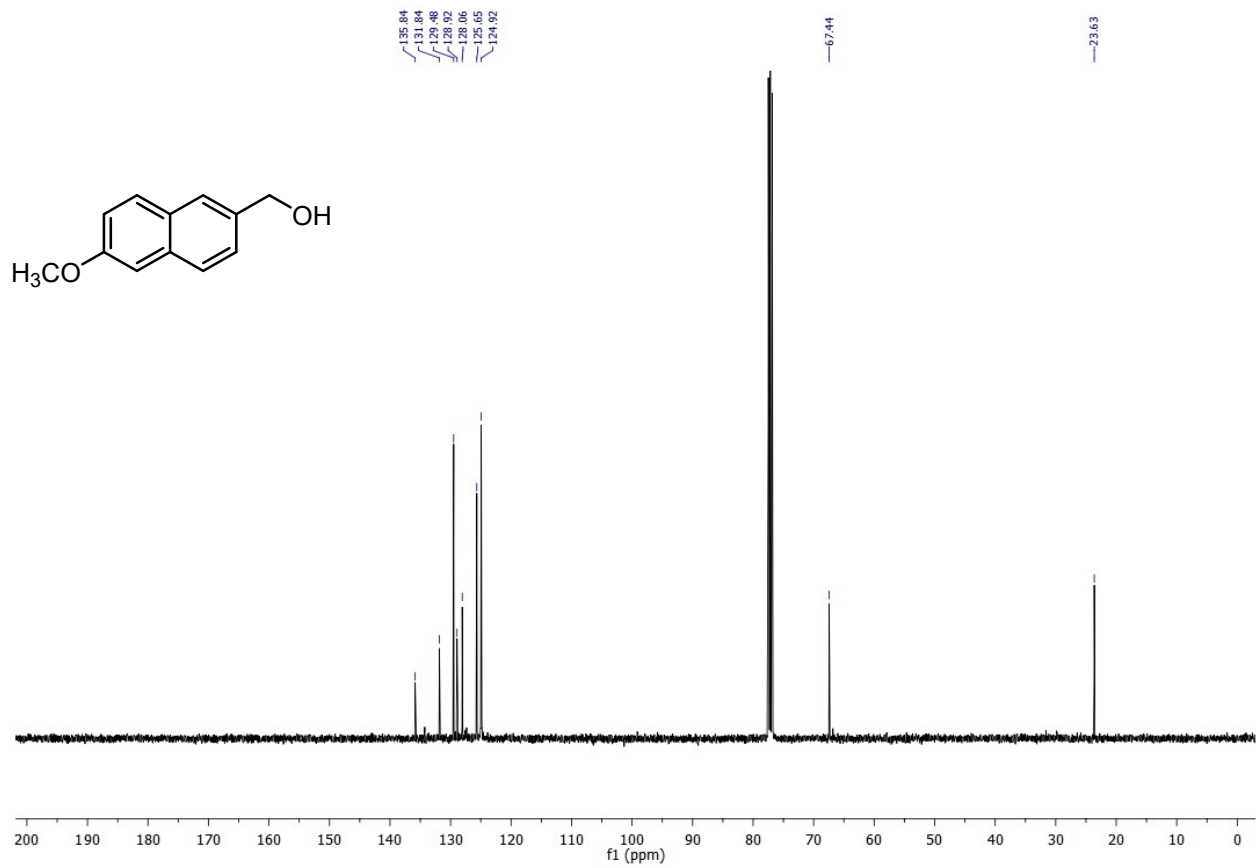



$^1\text{H}$  NMR Spectrum of **8u** ( $\text{CDCl}_3$ , 400 MHz)

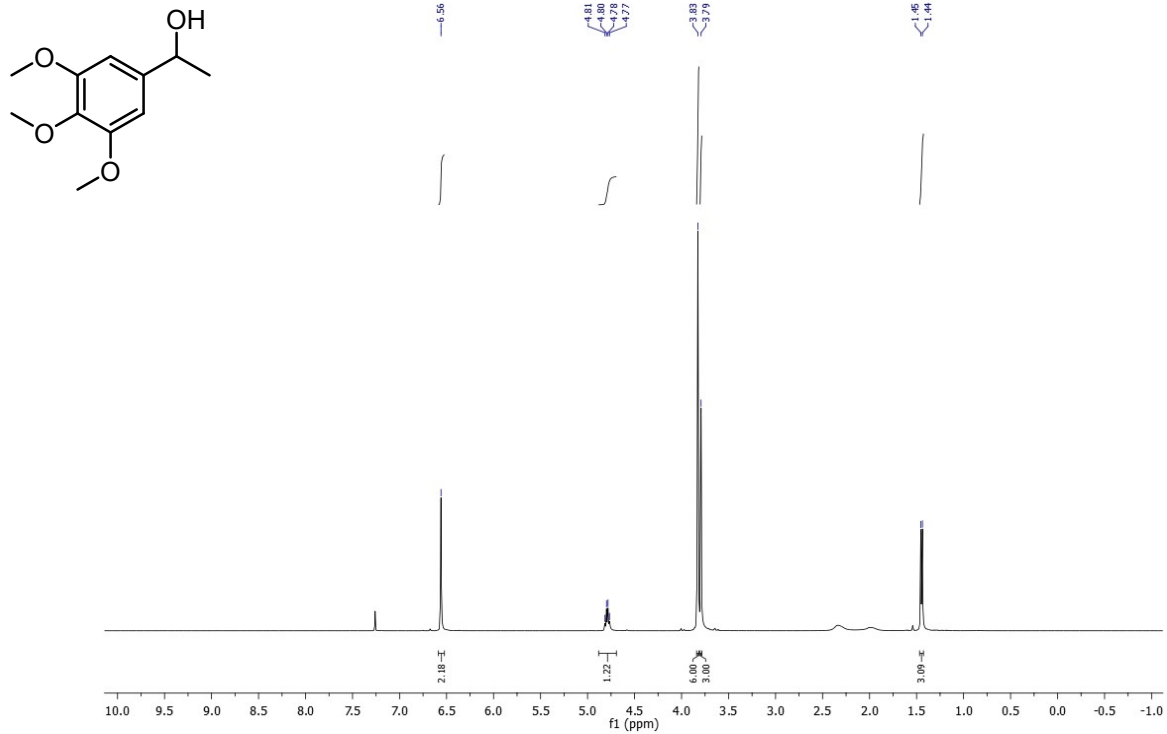

$^{13}\text{C}$   $\{^1\text{H}\}$  NMR Spectrum of **8u** ( $\text{CDCl}_3$ , 100 MHz)

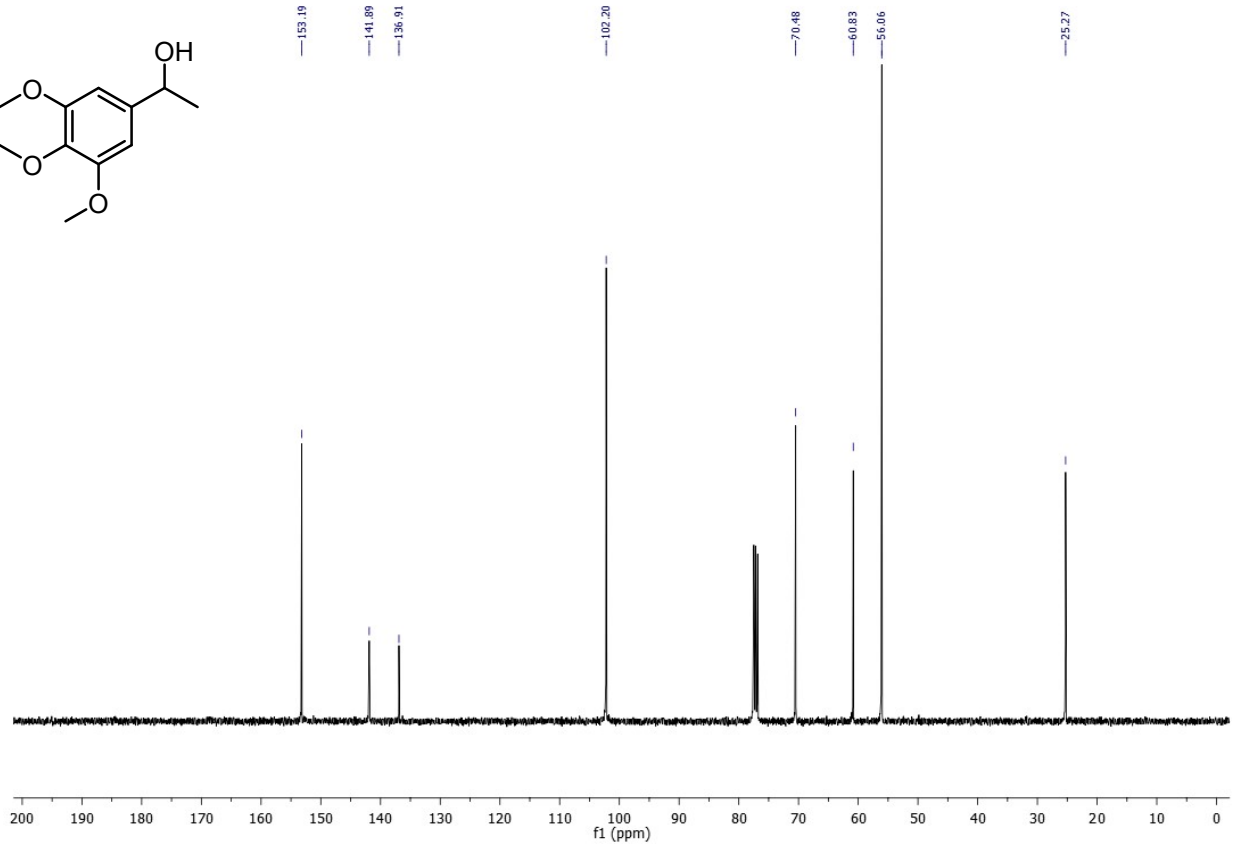

#### 4) Reaction Standardization through HPLC:

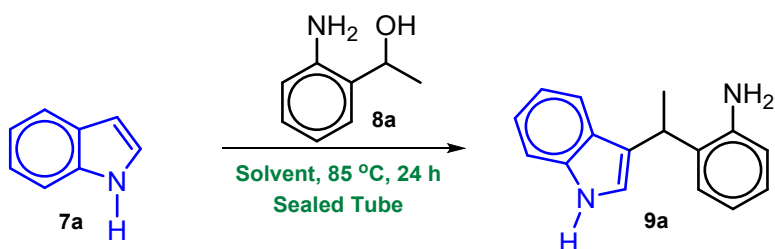

#### Area % Report When Reaction is Carried Out in Methanol

Data File: C:\Documents and Settings\user\Desktop\hplcMeOH (100%)-2.dat

Method: untitled.met

Acquired: 3/5/2024 12:43:17 AM (GMT +05:30)

Printed: 3/5/2024 1:02:40 AM (GMT +05:30)

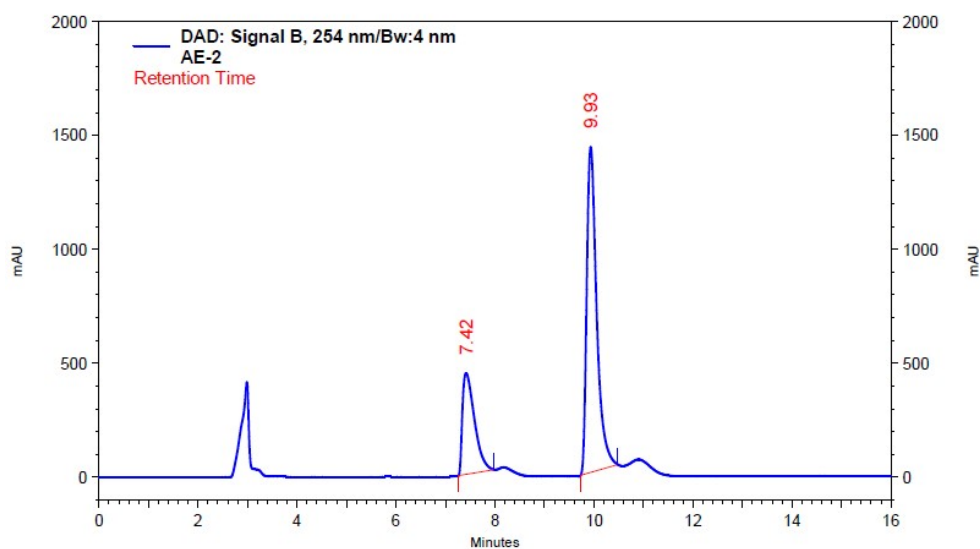

#### DAD: Signal B, 254 nm/Bw:4 nm Results

| Retention Time | Area     | Area % | Height  | Height % |
|----------------|----------|--------|---------|----------|
| 7.420          | 15749083 | 27.76  | 931122  | 23.72    |
| 9.933          | 41597266 | 72.24  | 2994924 | 76.28    |
| Totals         | 57346349 | 100.00 | 3926046 | 100.00   |

### Area % Report When Reaction is Carried Out in Water

Data File: C:\Documents and Settings\user\Desktop\auqib\H2O 100\AE-2.dat  
 Method: untitled.met  
 Acquired: 3/4/2024 11:08:38 PM (GMT +05:30)  
 Printed: 3/5/2024 12:23:36 AM (GMT +05:30)

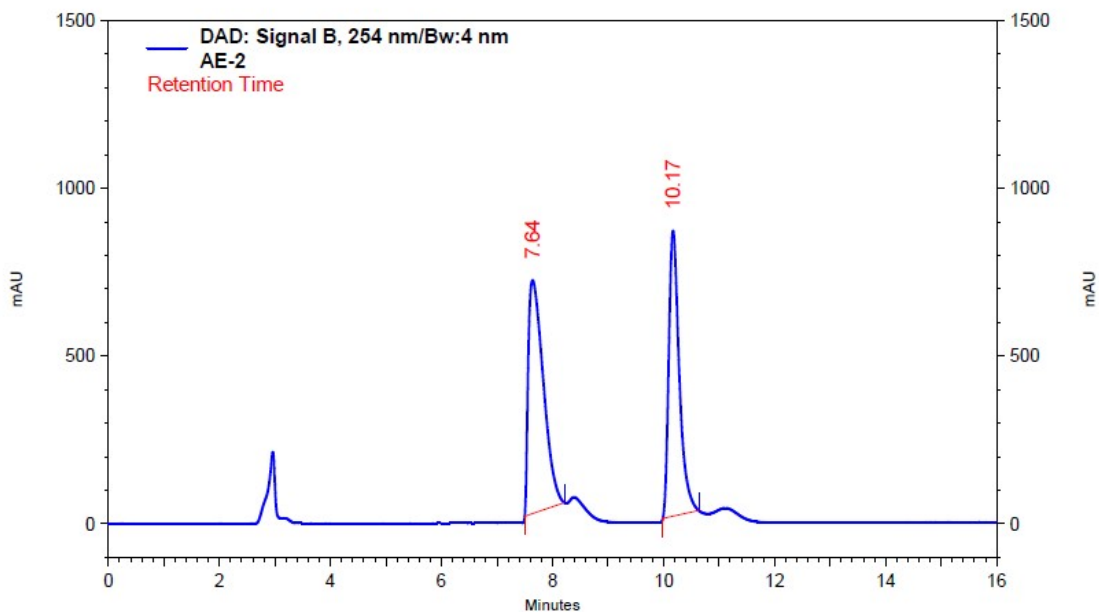

**DAD: Signal B,  
 254 nm/Bw:4 nm  
 Results**

| Retention Time | Area            | Area %        | Height         | Height %      |
|----------------|-----------------|---------------|----------------|---------------|
| 7.640          | 27466212        | 54.80         | 1458730        | 44.99         |
| 10.173         | 23426722        | 45.20         | 1783662        | 55.01         |
| <b>Totals</b>  | <b>50892934</b> | <b>100.00</b> | <b>3242392</b> | <b>100.00</b> |

### Area % Report When Reaction is Carried Out in Ethanol

Data File: C:\Documents and Settings\user\Desktop\EtOH-100.rslt\AE-2.dat Method: untitled.met  
 Acquired: 3/2/2024 2:04:42 PM (GMT +05:30)  
 Printed: 3/3/2024 5:52:15 PM (GMT +05:30)

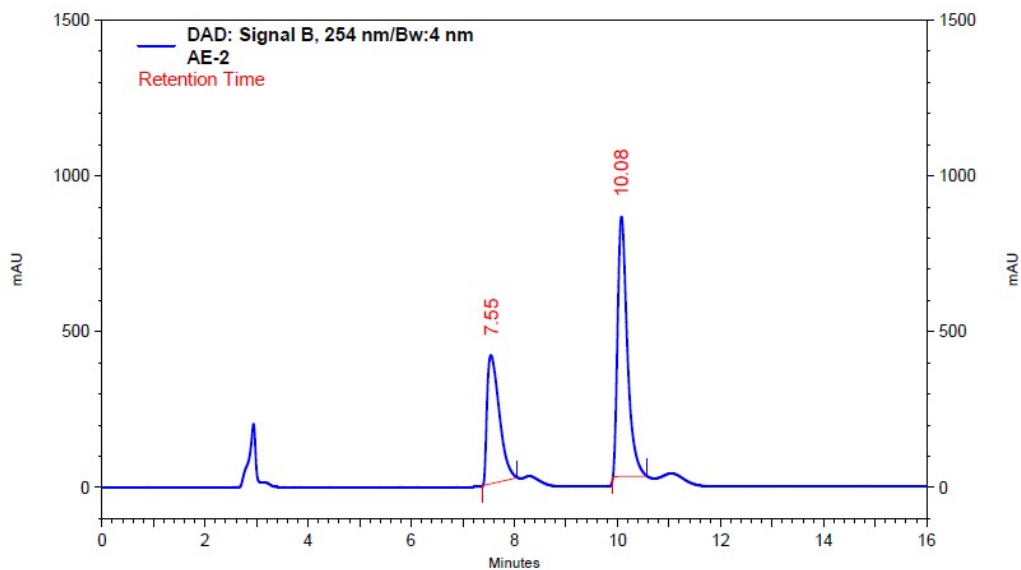

**DAD: Signal B,  
 254 nm/Bw:4 nm  
 Results**

| Retention Time | Area     | Area % | Height  | Height % |
|----------------|----------|--------|---------|----------|
| 7.547          | 14249211 | 40.03  | 864078  | 33.07    |
| 10.080         | 22966402 | 59.97  | 1748590 | 66.93    |

|        |          |        |         |        |
|--------|----------|--------|---------|--------|
| Totals | 37215613 | 100.00 | 2612668 | 100.00 |
|--------|----------|--------|---------|--------|

## Area % Report When Reaction is Carried Out in Isopropanol

Data File: C:\Documents and Settings\user\Desktop\MOMO SIR\ISOPROPENOL FINAL NEW  
 NEW.rslt\AE-2.dat  
 Method: untitled.met  
 Acquired: 3/4/2024 11:51:00 PM (GMT +05:30)  
 Printed: 3/5/2024 12:51:32 AM (GMT +05:30)

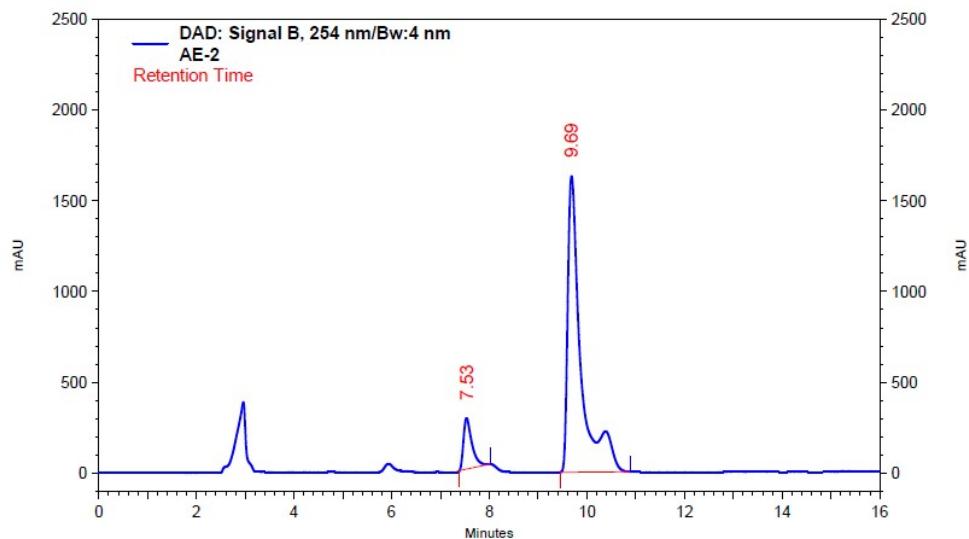

### DAD: Signal B, 254 nm/Bw:4 nm Results

| Retention Time | Area     | Area % | Height  | Height % |
|----------------|----------|--------|---------|----------|
| 7.533          | 6993055  | 8.45   | 589571  | 14.70    |
| 9.687          | 64537025 | 91.55  | 3420528 | 85.30    |

|        |          |        |         |        |
|--------|----------|--------|---------|--------|
| Totals | 71530080 | 100.00 | 4010099 | 100.00 |
|--------|----------|--------|---------|--------|



### Area % Report When Reaction is Carried Out in n-Butanol

Data File: C:\Documents and Settings\user\Desktop\MOMO SIR\N butanol FINAL NEW.rsl\AE-2.dat  
 Method: untitled.met  
 Acquired: 3/4/2024 10:03:01 PM (GMT +05:30)  
 Printed: 3/5/2024 12:54:26 AM (GMT +05:30)

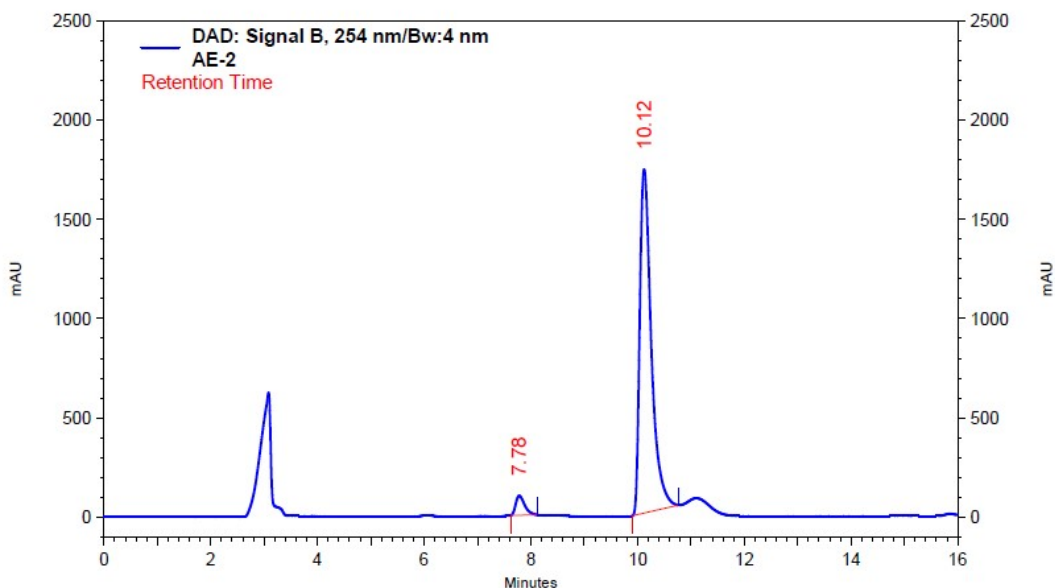

**DAD: Signal B,  
 254 nm/Bw:4 nm  
 Results**

| Retention Time | Area     | Area % | Height  | Height % |
|----------------|----------|--------|---------|----------|
| 7.780          | 2405583  | 4.63   | 205714  | 5.36     |
| 10.120         | 54400847 | 95.27  | 3631391 | 94.64    |

|        |          |        |         |        |
|--------|----------|--------|---------|--------|
| Totals | 56806430 | 100.00 | 3837105 | 100.00 |
|--------|----------|--------|---------|--------|

## Area % Report When Reaction is Carried Out in tert-Butanol

Data File: C:\Documents and Settings\user\Desktop\MOMO SIR\tert butanol FINAL NEW.rslt\AE-2.dat  
 Method: untitled.met  
 Acquired: 3/4/2024 9:17:49 PM (GMT +05:30)  
 Printed: 3/5/2024 12:46:31 AM (GMT +05:30)

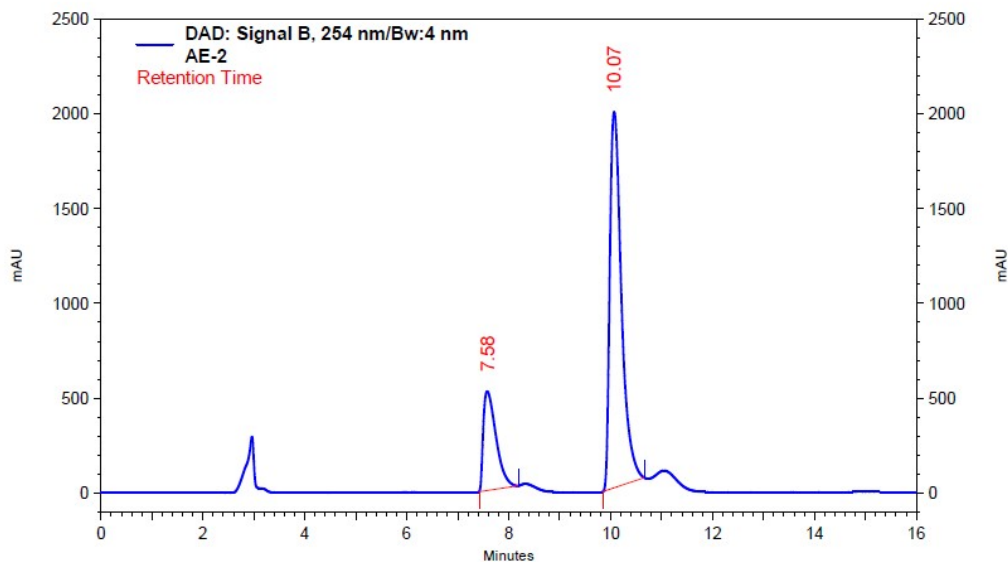

### DAD: Signal B, 254 nm/Bw:4 nm Results

| Retention Time | Area     | Area % | Height  | Height % |
|----------------|----------|--------|---------|----------|
| 7.580          | 19028630 | 24.70  | 1097364 | 20.88    |
| 10.067         | 66234600 | 75.30  | 4159156 | 79.12    |

|        |          |        |         |        |
|--------|----------|--------|---------|--------|
| Totals | 85263230 | 100.00 | 5256520 | 100.00 |
|--------|----------|--------|---------|--------|

**Area % Report when reaction is carried out in HFIP**

Data File: C:\Documents and Settings\user\Desktop\HFIP .result\AE-2.dat Method: untitled.met  
 Acquired: 3/4/2024 8:28:56 PM (GMT +05:30)  
 Printed: 3/5/2024 12:27:55 AM (GMT +05:30)

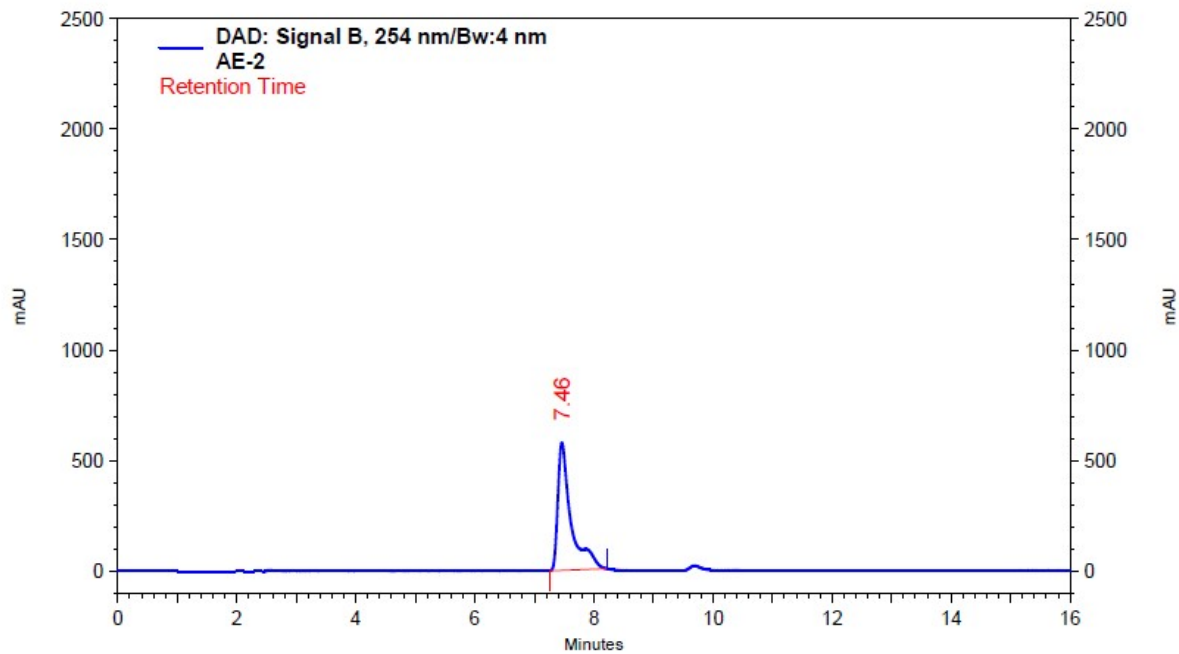

**DAD: Signal B, 254 nm/Bw:4 nm Results**

| Retention Time | Area     | Area % | Height  | Height % |
|----------------|----------|--------|---------|----------|
| 7.460          | 18667654 | 100.00 | 1211003 | 100.00   |

|        |          |        |         |        |
|--------|----------|--------|---------|--------|
| Totals | 18667654 | 100.00 | 1211003 | 100.00 |
|--------|----------|--------|---------|--------|

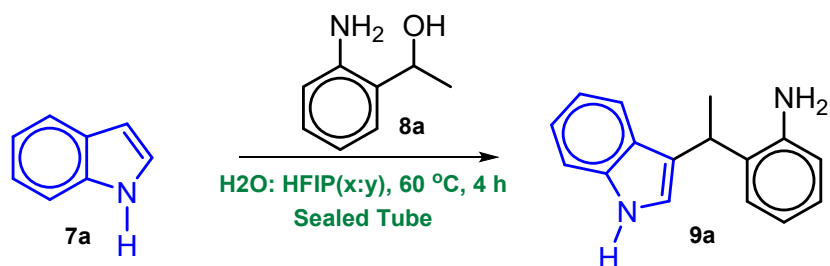

### Area % Report when reaction is carried out in H<sub>2</sub>O

Data File: C:\Documents and Settings\user\Desktop\MOMO SIR\AQIB H2O.rslt\AE-2.dat  
 Method: untitled.met  
 Acquired: 3/4/2024 1:09:58 AM (GMT +05:30)  
 Printed: 3/4/2024 1:28:18 AM (GMT +05:30)

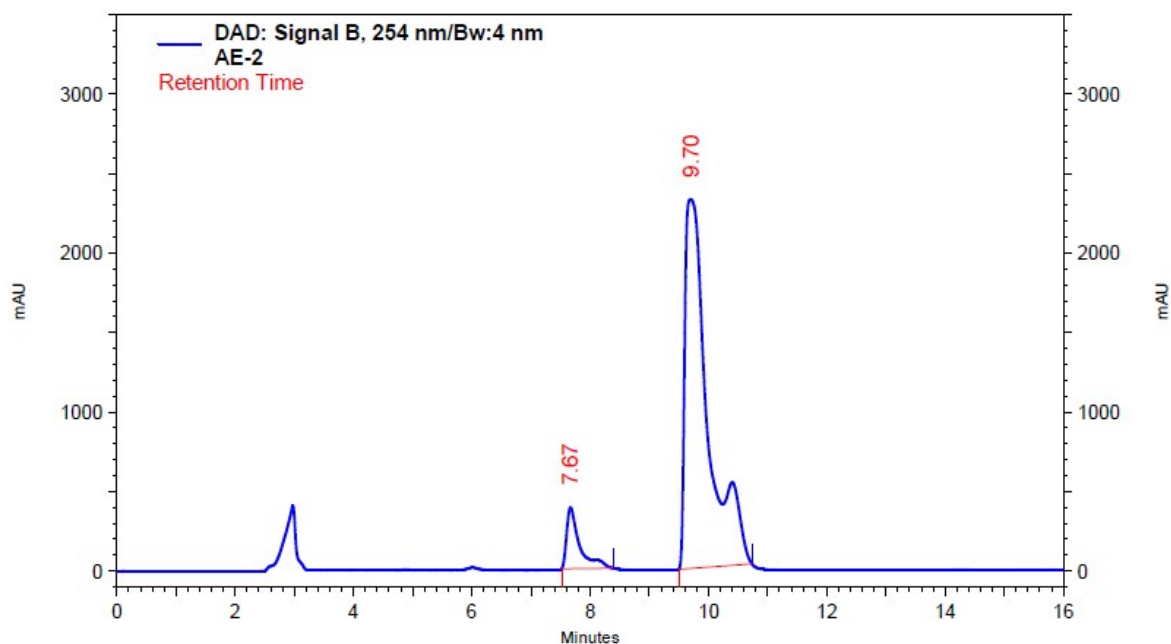

### DAD: Signal B, 254 nm/Bw:4 nm Results

| Retention Time | Area      | Area % | Height  | Height % |
|----------------|-----------|--------|---------|----------|
| 7.667          | 12273542  | 11.62  | 807646  | 14.22    |
| 9.700          | 131329868 | 88.38  | 4871530 | 85.78    |
| Totals         | 143603410 | 100.00 | 5679176 | 100.00   |

**Area % Report when reaction is carried out in H<sub>2</sub>O: HFIP (9:1)**

Data File: C:\Documents and Settings\user\Desktop\MOMO SIR\AQIB 91.rsl\AE-2.dat  
 Method: untitled.met  
 Acquired: 3/4/2024 12:45:38 AM (GMT +05:30)  
 Printed: 3/4/2024 1:03:58 AM (GMT +05:30)

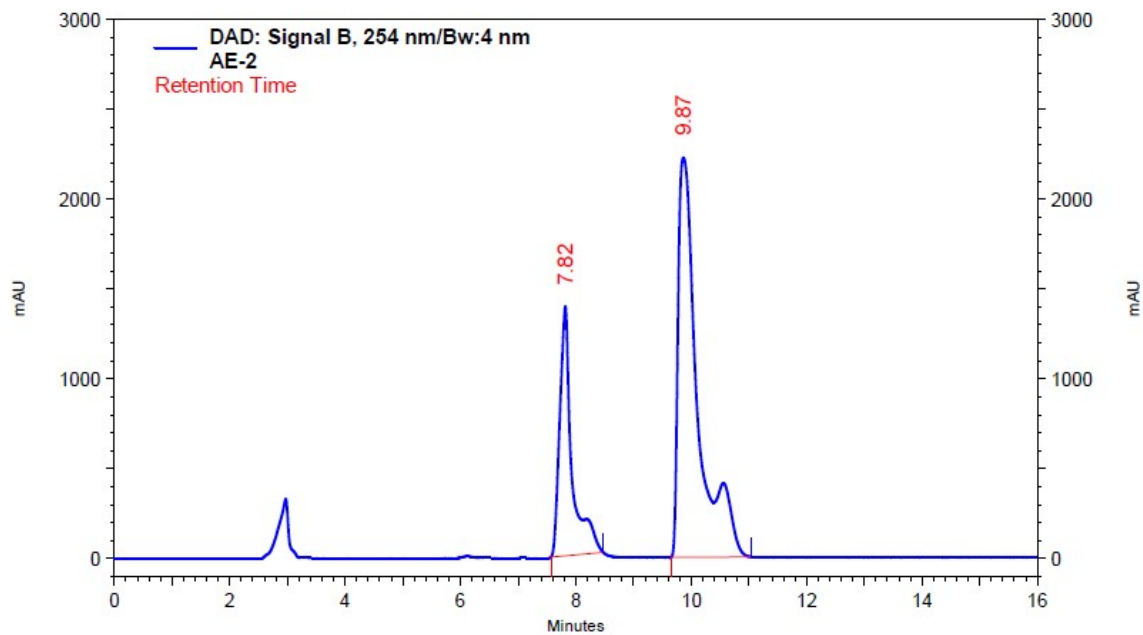

**DAD: Signal B,  
254 nm/Bw:4 nm  
Results**

| Retention Time | Area      | Area % | Height  | Height % |
|----------------|-----------|--------|---------|----------|
| 7.820          | 42780126  | 29.89  | 2910892 | 38.43    |
| 9.867          | 110581383 | 70.11  | 4663803 | 61.57    |

|        |           |        |         |        |
|--------|-----------|--------|---------|--------|
| Totals | 153361509 | 100.00 | 7574695 | 100.00 |
|--------|-----------|--------|---------|--------|

**Area % Report when reaction is carried out in H<sub>2</sub>O: HFIP (8:2)**

Data File: C:\Documents and Settings\user\Desktop\AUQIB 8/2-.rslt\AE-2.dat Method: untitled.met  
 Acquired: 3/4/2024 12:14:53 AM (GMT +05:30)  
 Printed: 3/4/2024 12:38:19 AM (GMT +05:30)

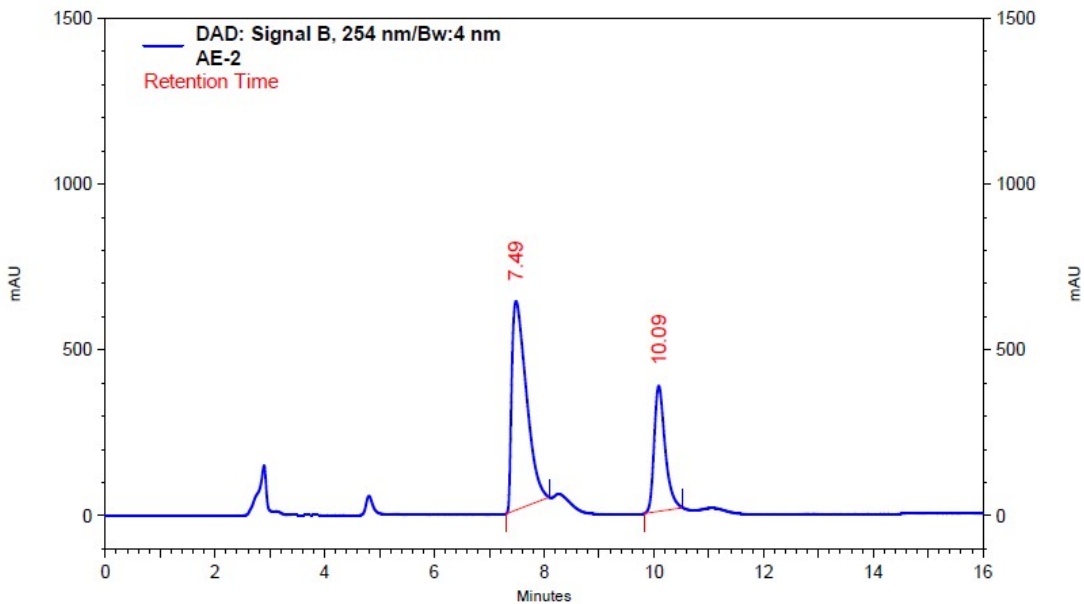

**DAD: Signal B,  
254 nm/Bw:4 nm  
Results**

| Retention Time | Area     | Area % | Height  | Height % |
|----------------|----------|--------|---------|----------|
| 7.487          | 24529316 | 68.89  | 1320983 | 62.47    |
| 10.087         | 11078158 | 31.11  | 793628  | 37.53    |

|        |          |        |         |        |
|--------|----------|--------|---------|--------|
| Totals | 35607474 | 100.00 | 2114611 | 100.00 |
|--------|----------|--------|---------|--------|

**Area % Report % when reaction is carried out in H<sub>2</sub>O: HFIP (7:3)**

Data File: C:\Documents and Settings\user\Desktop\MOMO SIR\AQIB 73 NEW.rsl\AE-2.dat  
 Method: untitled.met  
 Acquired: 3/3/2024 9:54:38 PM (GMT +05:30)  
 Printed: 3/4/2024 12:58:55 AM (GMT +05:30)

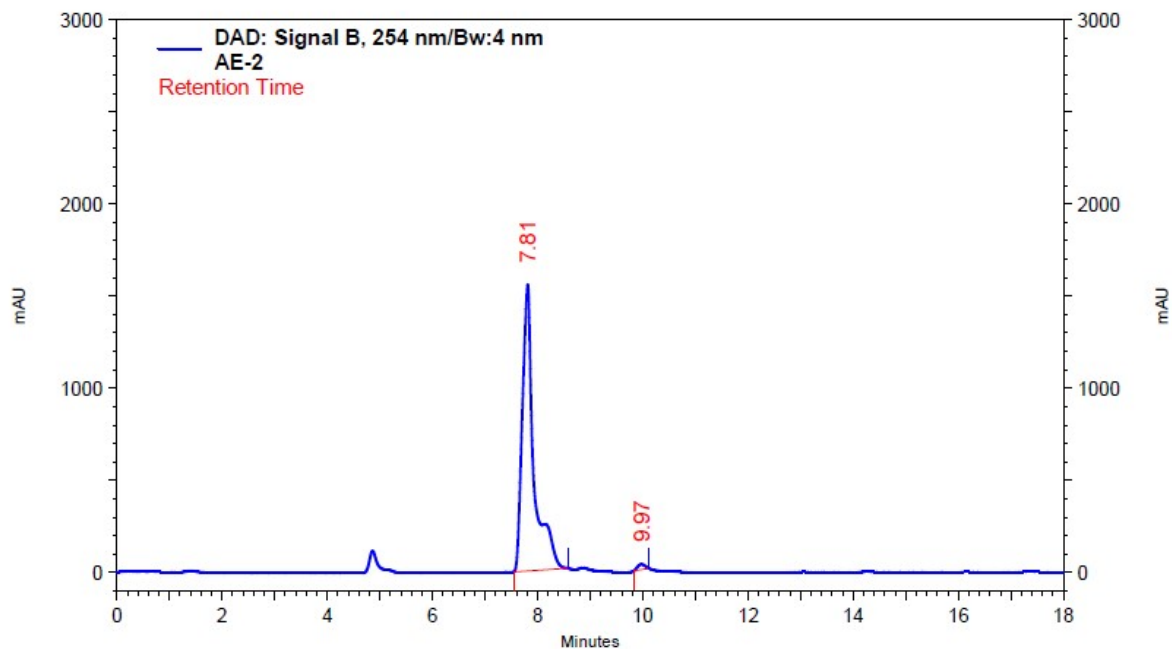

**DAD: Signal B,  
 254 nm/Bw:4 nm  
 Results**

| Retention Time | Area     | Area % | Height  | Height % |
|----------------|----------|--------|---------|----------|
| 7.813          | 49557538 | 99.51  | 3259982 | 98.17    |
| 9.973          | 591464   | 0.49   | 60793   | 1.83     |

|        |          |        |         |        |
|--------|----------|--------|---------|--------|
| Totals | 50149002 | 100.00 | 3320775 | 100.00 |
|--------|----------|--------|---------|--------|

**Area % Report when reaction is carried out in H<sub>2</sub>O: HFIP (6:4)**

Data File: C:\Documents and Settings\user\Desktop\MOMO SIR\AQIB 32.rslt\AE-2.dat  
 Method: untitled.met  
 Acquired: 3/3/2024 9:20:45 PM (GMT +05:30)  
 Printed: 3/4/2024 12:55:30 AM (GMT +05:30)

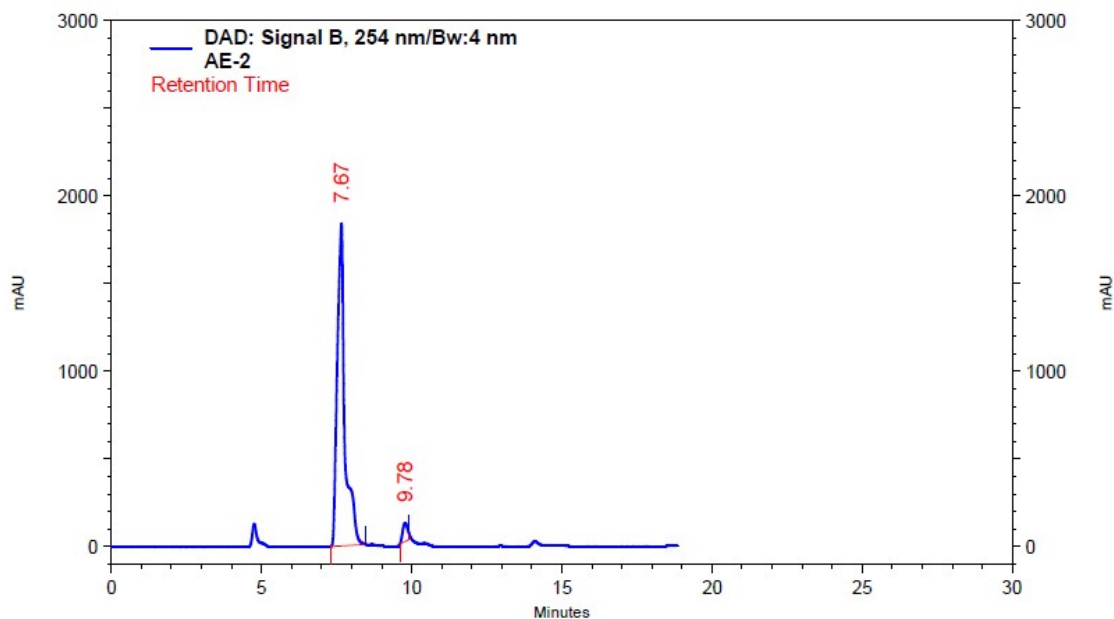

**DAD: Signal B, 254 nm/Bw:4 nm Results**

| Retention Time | Area     | Area % | Height  | Height % |
|----------------|----------|--------|---------|----------|
| 7.667          | 67496173 | 96.43  | 3852936 | 94.58    |
| 9.780          | 2498622  | 3.57   | 220967  | 5.42     |

|        |          |        |         |        |
|--------|----------|--------|---------|--------|
| Totals | 69994795 | 100.00 | 4073903 | 100.00 |
|--------|----------|--------|---------|--------|



**Area % Report when reaction is carried out in H<sub>2</sub>O: HFIP (1:1)**

Data File: C:\Documents and Settings\user\Desktop\MOMO SIR\AQIB 11.rslt\AE-2.dat  
 Method: untitled.met  
 Acquired: 3/3/2024 9:00:40 PM (GMT +05:30)  
 Printed: 3/4/2024 12:50:57 AM (GMT +05:30)

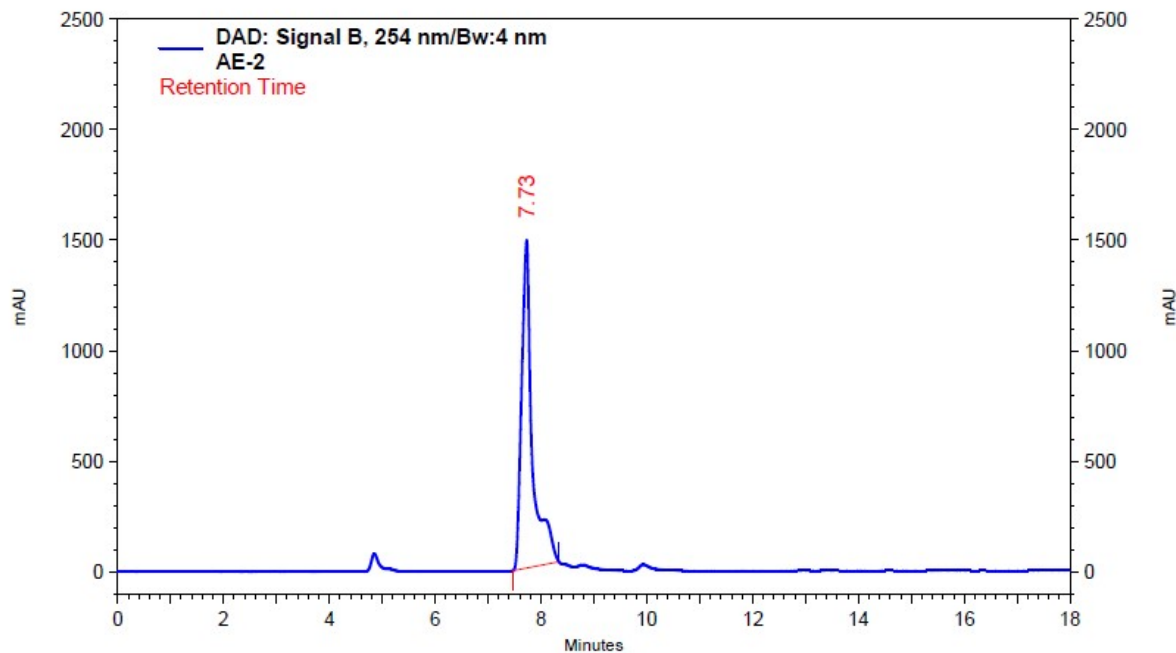

**DAD: Signal B,  
 254 nm/Bw:4 nm  
 Results**

| Retention Time | Area     | Area % | Height  | Height % |
|----------------|----------|--------|---------|----------|
| 7.727          | 43693272 | 100.00 | 3105474 | 100.00   |
| Totals         |          |        |         |          |
|                | 43693272 | 100.00 | 3105474 | 100.00   |

## 5) HRMS data

HRMS of Compounds **9q**, **9r**, **9s** **9t** and **10g** are attached below: High-resolution mass spectrometry (HRMS) was measured on an electrospray ionization (ESI) apparatus using the

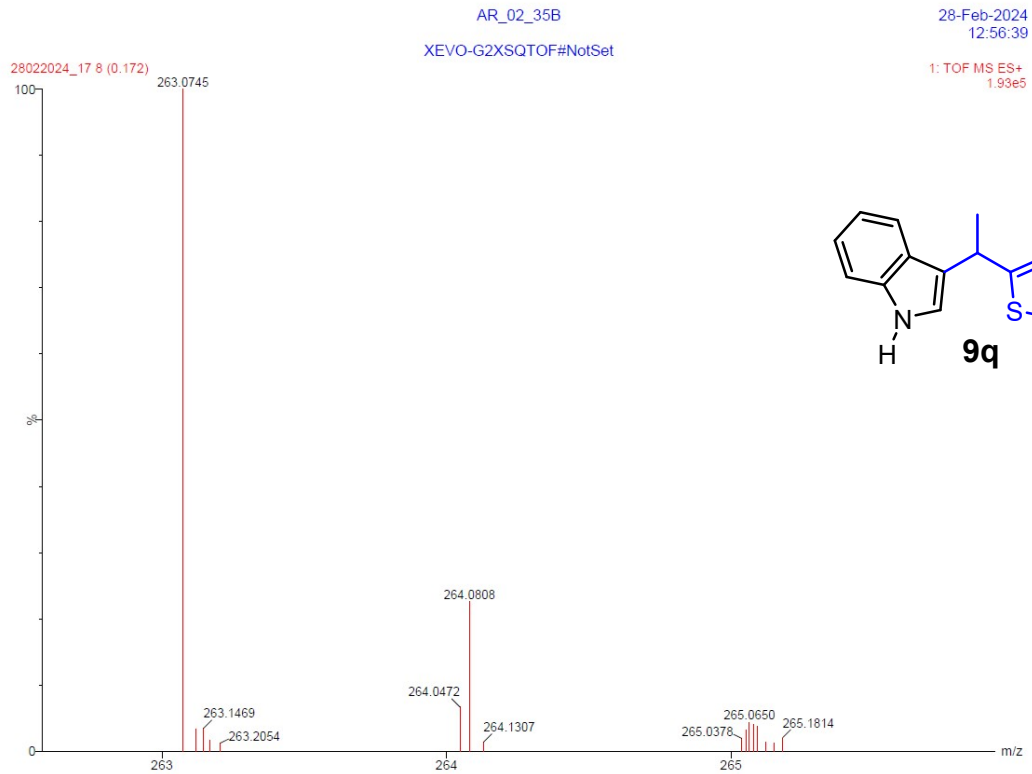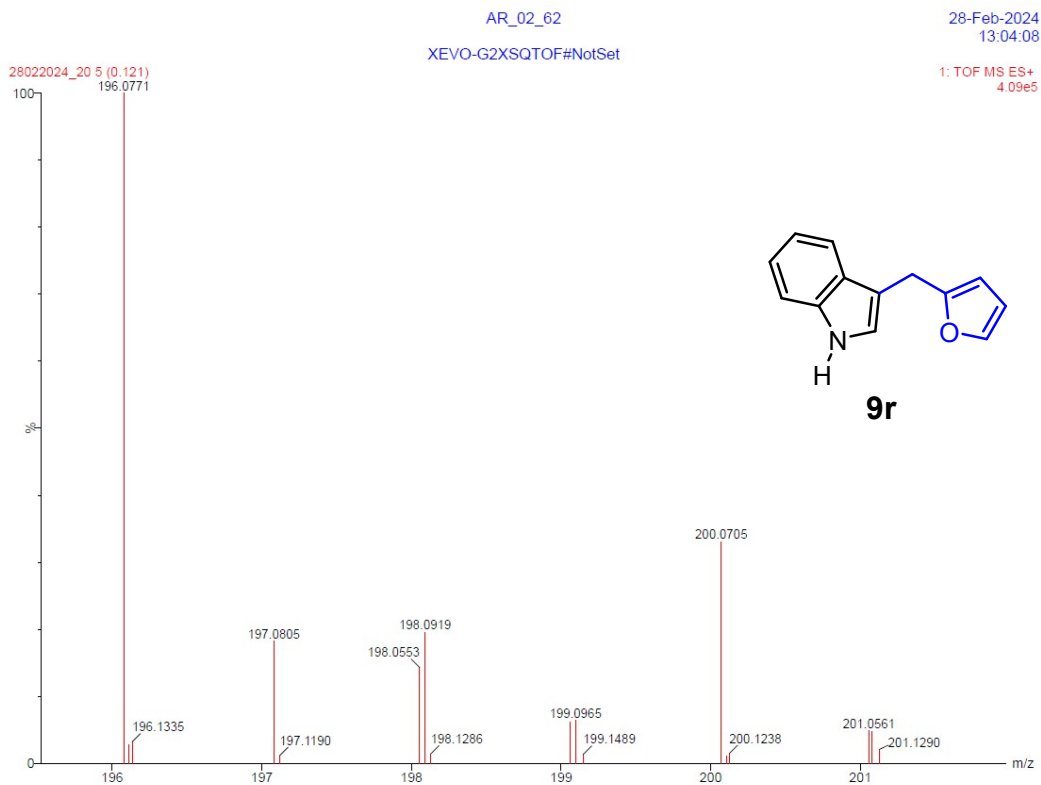

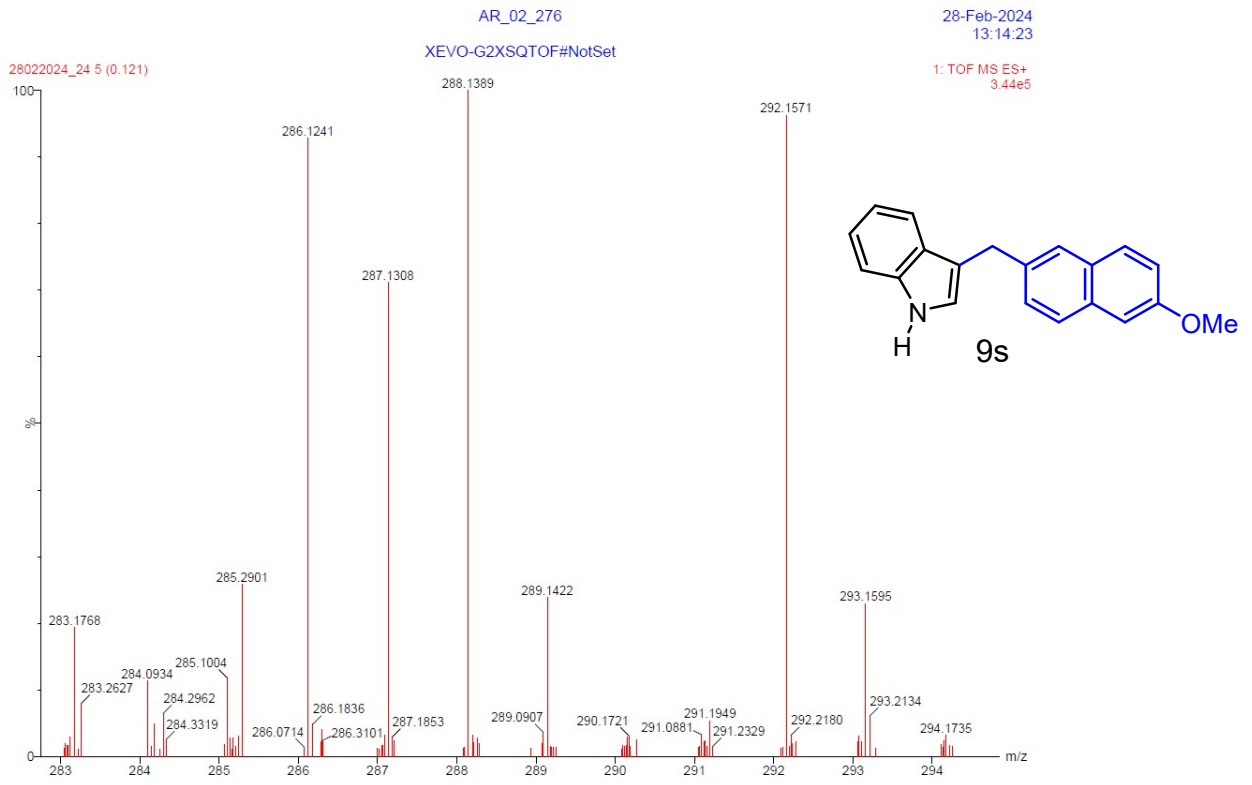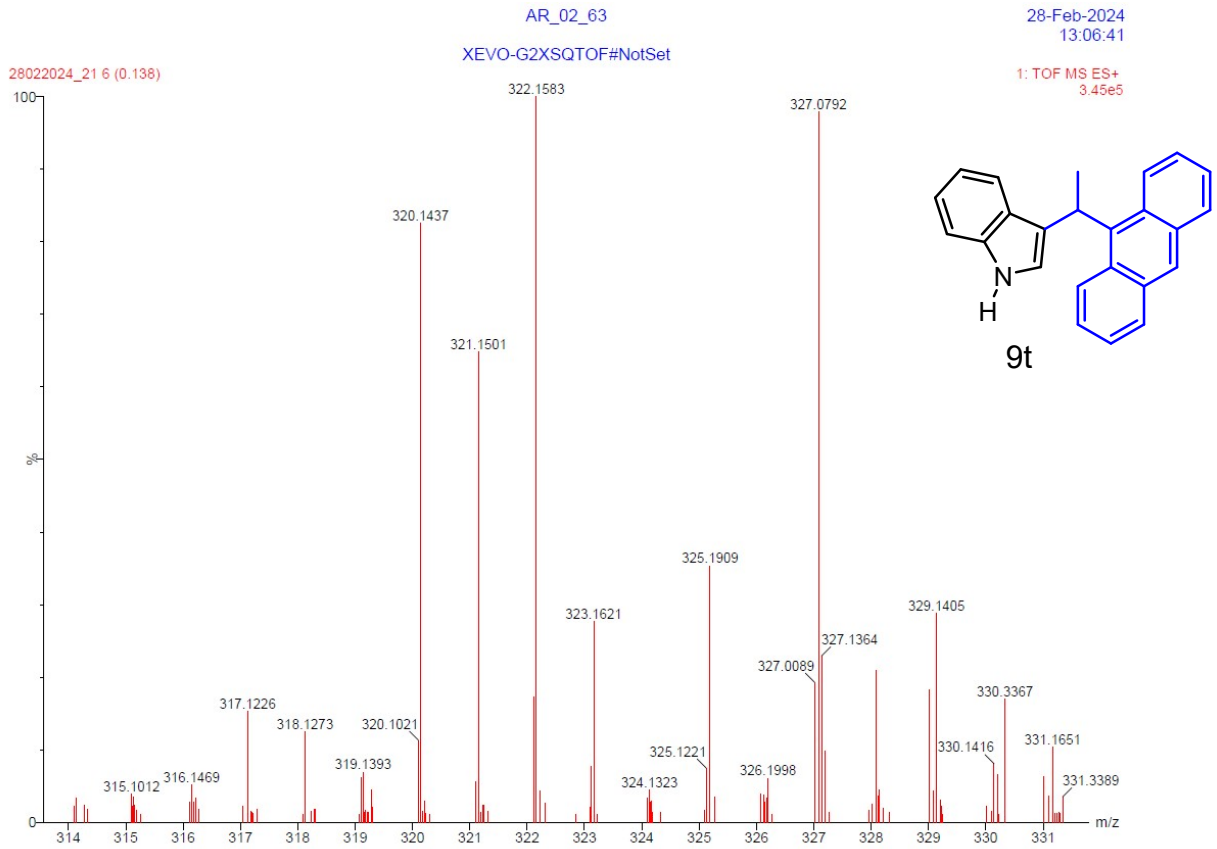

28022024\_26 8 (0.172)

1: TOF MS ES+  
9.55e4

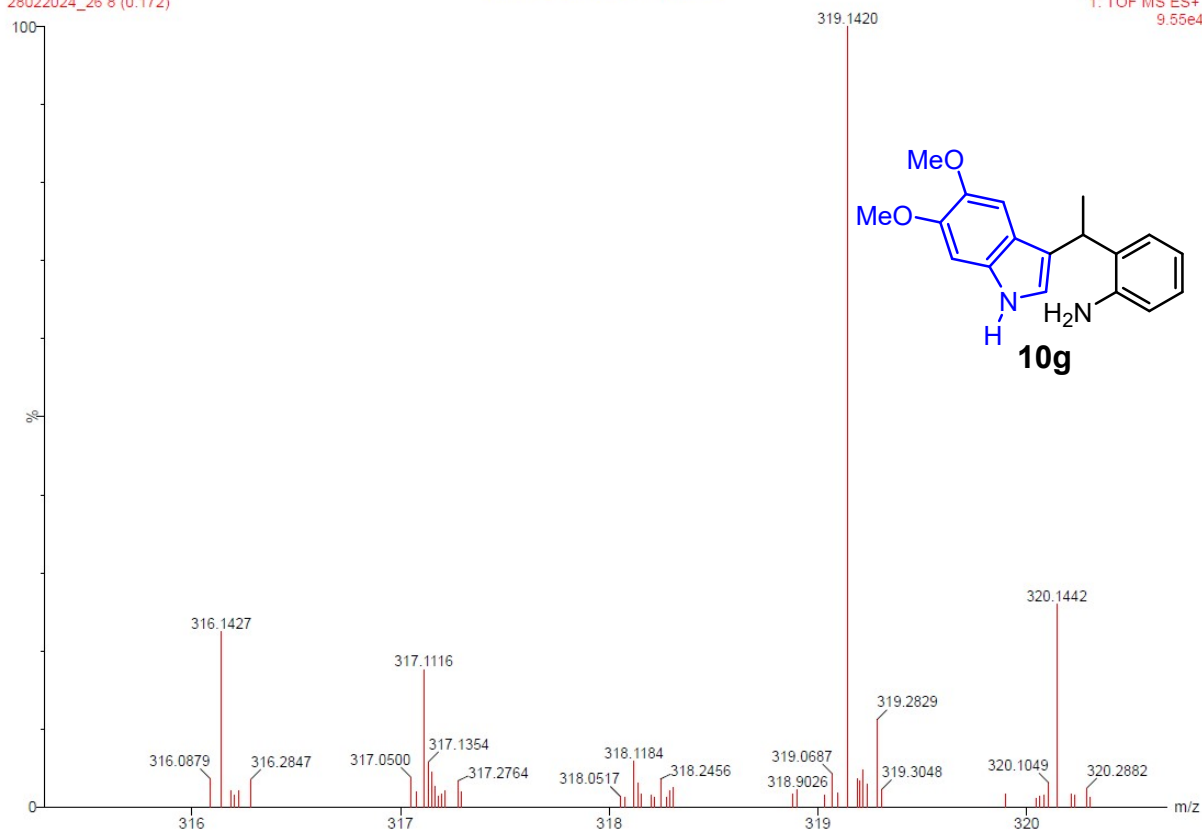

References:

1. K, Tanemura, Results Chem., 2022, 4, 100486.
